# 1 **Escape of TLR5 Recognition by *Leptospira spp*: A Rationale for Atypical Endoflagella**

2

3 Marion Holzapfel<sup>\*</sup>, Delphine Bonhomme<sup>Δ\*</sup>, Julie Cagliero<sup>§</sup>, Frédérique Vernel-Pauillac\*, Martine  
4 Fanton d'Andon\*, Sophia Bortolussi\*, Laurence Fiette<sup>°</sup>, Cyrille Goarant<sup>#</sup>, Elsio A. Wunder Jr.<sup>+</sup>,  
5 Mathieu Picardeau<sup>†</sup>, Albert I. Ko<sup>+</sup>, Dirk Werling<sup>^</sup>, Mariko Matsui<sup>§</sup>, Ivo G. Boneca\* and Catherine  
6 Werts<sup>\*1</sup>

7

8 <sup>\*</sup>Institut Pasteur, Unité Biologie et Génétique de la Paroi Bactérienne, Paris, France; CNRS, UMR 2001  
9 « Microbiologie intégrative et Moléculaire », Paris, France ; INSERM, Equipe Avenir, Paris, France.

10 <sup>Δ</sup>Université de Paris, Sorbonne Paris Cité, Paris, France

11 <sup>§</sup>Institut Pasteur de Nouvelle Calédonie, Immunity and Inflammation Group, Institut Pasteur International  
12 Network, Noumea, France.

13 <sup>°</sup> Institut Pasteur, Unité histopathologie humaine et modèles animaux. Paris, France. Current address: IMMR, 42  
14 Boulevard Jourdan, 75014 Paris, France

15 <sup>†</sup>Institut Pasteur, Unité Biologie des Spirochètes, Paris, France

16 <sup>#</sup>Institut Pasteur de Nouvelle Calédonie, Leptospirosis Research and Expertise Unit, Institut Pasteur  
17 International Network, Noumea, France.

18 <sup>+</sup>Department of Epidemiology of Microbial Diseases, Yale School of Public Health, New Haven, CT, United  
19 States.

20 <sup>+</sup>Gonçalo Moniz Institute, Oswaldo Cruz Foundation; Brazilian Ministry of Health; Salvador, Brazil.

21 <sup>^</sup>Department of Pathobiology and Population Sciences, Royal Veterinary College, Hatfield, UK

22

23 <sup>\*</sup> co first authors

24 <sup>1</sup>Corresponding author. C. Werts. Email: [cwerts@pasteur.fr](mailto:cwerts@pasteur.fr)

25

## 26 **Abstract**

27 *Leptospira interrogans* are invasive bacteria responsible for leptospirosis, a worldwide zoonosis. They  
28 possess two periplasmic endoflagella that allow their motility. *L. interrogans* are stealth pathogens that  
29 escape the innate immune responses of the NOD-like receptors NOD1/2, and the human Toll-like  
30 receptor (TLR)4, sensing peptidoglycan and lipopolysaccharide (LPS), respectively. TLR5 is another  
31 receptor of bacterial cell wall components, recognizing flagellin subunits.

32 To study the contribution of TLR5 in the host defense against leptospires, we infected WT and TLR5  
33 deficient mice with pathogenic *L. interrogans* and tracked the infection by *in vivo* live imaging of  
34 bioluminescent bacteria or by q-PCR. We did not identify any protective or inflammatory role of  
35 murine TLR5 to control pathogenic *Leptospira*. Likewise, subsequent *in vitro* experiments showed  
36 that infections with different live strains of *L. interrogans* and *L. biflexa* did not trigger TLR5.  
37 However, unexpectedly, heat-killed bacteria stimulated human and bovine TLR5, although barely

38 mouse TLR5. Abolition of TLR5 recognition required extensive boiling time of the bacteria or  
39 proteinase K treatment, showing an unusual high stability of the leptospiral flagellins. Interestingly,  
40 using antimicrobial peptides to destabilize live leptospires, we detected some TLR5 activity,  
41 suggesting that TLR5 could participate in the fight against leptospires in humans or cattle. Using  
42 different *Leptospira* strains with mutations in flagellin proteins, we further showed that neither FlaAs  
43 nor Fcps participated in the recognition by TLR5, suggesting a role for the FlaBs. These have  
44 structural homology to *Salmonella* FliC, and conserved residues important for TLR5 activation, as  
45 shown by *in silico* analyses. Accordingly, we found that leptospires regulate the expression of FlaB  
46 mRNA according to the growth phase *in vitro*, and that infection with *L. interrogans* in hamsters and  
47 in mice downregulated the expression of the FlaBs but not the FlaAs subunits.

48 Altogether, in contrast to different bacteria that modify their flagellin sequences to escape TLR5  
49 recognition, our study suggests that the peculiar central localization and stability of the FlaB  
50 monomers in the periplasmic endoflagella, associated with the downregulation of FlaB subunits in  
51 hosts, constitute an efficient strategy of leptospires to escape TLR5 recognition and the immune  
52 response.

53

## 54 **Introduction**

55 Leptospires are spirochetal bacteria responsible for leptospirosis, a neglected re-emerging zoonosis [1].  
56 Among the *Leptospira* genus, which includes more than 60 species and 300 different serovars,  
57 *Leptospira interrogans* gathers the most pathogenic strains [2]. Rodents and other animals can carry  
58 leptospires asymptotically in the lumen of proximal renal tubules, excrete the bacteria in their urine  
59 and contaminate the environment. Vertebrates get infected through skin or mucosa. In most cases,  
60 humans have no symptoms or suffer from a flu-like mild disease, but may also show acute severe,  
61 potentially fatal, leptospirosis. Antibiotic treatments are efficient only if administered at the onset of  
62 symptoms. The high number of leptospiral serovars and strains complicates the diagnosis and impairs  
63 vaccinal strategies.

64

65 *Leptospira* are motile bacteria able to swim very fast in viscous environments. They possess two  
66 endoflagella, one inserted at each pole of the bacteria, which do not protrude outside of the bacteria  
67 but are localized and rotate within the periplasmic space. As seen in other spirochetes, the leptospiral  
68 genomes exhibit an atypical high number of structural flagellar genes, including four FlaB subunits  
69 with homology to FliC, the unique flagellin monomer forming the filament of *Salmonella spp.* The  
70 structure of the leptospiral filament and the roles of the different flagellar proteins and additional  
71 specific components of leptospires such as the Fcp proteins [3; 4; 5; 6; 7], have been recently  
72 elucidated by high-resolution cryo-electron microscopy coupled to model building and crystallography  
73 analyses [8]. The leptospiral filament has an atypical flattened helical shape. The four FlaB subunits  
74 constitute the core of the flagellum, surrounded by two FlaA and two Fcp subunits that form a sheath.  
75 [8].

76  
77 The innate defense of the host relies on the complement system and on immune receptors, also known  
78 as pattern recognition receptors (PRRs), such as Toll-like Receptor (TLR) and NOD-like receptor  
79 (NLR) families. TLRs and NLRs recognize conserved microbe-associated molecular patterns  
80 (MAMPs) and induce immune inflammatory responses that trigger cellular recruitment, ultimately  
81 leading to the destruction of microbes by phagocytes [9].

82  
83 FliC, the prototypical bacterial flagellin, forms a hairpin-like structure with 4 connected domains  
84 designated D0, D1, D2, and D3, with both C and N termini associated in the D0 domain [10]. The D2  
85 and D3 domains are highly variable and support the antigenic diversity. FliC is recognized by different  
86 PRRs, expressed on the surface of cells as well as intracellular. TLR5 is expressed at the surface of  
87 cells and recognizes monomers of flagellin in the D1 domain, whereas in the cytosol FliC is  
88 recognized through the D0 domain by the NAIP inflammasome, which associates with the  
89 IPAF/NLRC4, a NOD-like receptor [11; 12]. TLR5 is an essential innate immune receptor expressed  
90 in the kidney and, along with TLR4, important to control *Enterobacteria* [13]. Moreover it is one of  
91 the very few TLRs able to recognize a protein agonist, conferring potent adjuvant properties, and  
92 helping adaptive immune responses [14].

93

94 We previously showed that *Leptospira* infection triggers the NLRP3 inflammasome, using the ASC  
95 adaptor. The results using ASCKO mice reproduced the results obtained with the NLRP3KO mice and  
96 suggest that the contribution of other inflammasome receptors, such as the NAIP/NLRC4 would be  
97 minimal [15]. We also showed that *L. interrogans* escapes recognition by human TLR4 [16] as well as  
98 murine and human NOD1 and NOD2 [17]. In this work, we investigated whether leptospiral flagellins  
99 are either recognized by or also escape recognition by TLR5. Our results suggest that live pathogenic  
100 leptospires largely escape recognition by human and murine TLR5, although their FlaBs subunits are  
101 able to signal through human TLR5. This suggests that the periplasmic localization of the flagella and  
102 the concealing of FlaBs in the core of the filament contribute to avoiding the TLR5 recognition  
103 pathway.

104

## 105 **Materials and Methods**

### 106 **Leptospiral strains and culture conditions**

107 Pathogenic *L. interrogans* serovar Icterohaemorrhagiae strain Verdun, *L. interrogans* serovar  
108 Copenhageni strain Fiocruz L1-130, *L. interrogans* serovar Manilae strain L495, and the saprophytic *L.*  
109 *biflexa* serovar Patoc strain Patoc I have initially been provided by the collection of the National  
110 Reference Center for Leptospirosis of the Institut Pasteur in Paris. The L495 derivative bioluminescent  
111 strain MFLum1 [18], the clinical isolate Fiocruz LV2756 and its non-mobile *fcpA* mutant [5], the *L.*  
112 *interrogans* Manilae *flaA2* mutant, as well as the *flaB4* mutant of *L. biflexa* Patoc have all been  
113 previously described [3; 19]. The *L. biflexa fcpA* and *L. interrogans* Manilae *flaB1* mutants have been  
114 generated for this study by random mutagenesis [20].

115 Bacteria were grown in Ellinghausen-McCullough-Johnson-Harris (EMJH) medium (Bio-Rad) at  
116 30 °C without agitation and weekly passaged, counted using a Petroff-Hauser chamber and seeded at  
117  $5.10^6$  bacteria per mL (bact/mL). Bacteria in mid-log exponential phase (around  $10^8$  bact /mL), and  
118 bacteria in stationary phase (around 1 to  $5 \times 10^9$  bact/mL) were harvested from 3-6-day old cultures and  
119 10-14-day old cultures, respectively. Unless otherwise specified, experiments were performed with  
120 one-week old cultures. The *L. biflexa* Patoc Patoc I strain was passaged twice a week by a 1/250

121 dilution and seeded at around  $5.10^6$  bact/mL. For experiments conducted in New Caledonia, virulent *L.*  
122 *interrogans* serovar Icterohaemorrhagiae strain Verdun was cultured in EMJH medium at 30°C under  
123 aerobic conditions as previously described [21]. For *in vitro flaB* gene expression assays, cultures of  
124 each *Leptospira* strain were seeded in triplicate at  $5.10^6$  (Day 0). On Day 3 (exponential growth phase)  
125 and Day 14 (stationary growth phase),  $5.10^8$  bacteria from each culture were harvested and centrifuged  
126 at 3250 g for 20 min, EMJH was discarded and bacteria were resuspended in 500 µL of RNAlater  
127 Buffer (Qiagen) for RNA stabilization, kept at room temperature for 2 h before conservation at -20°C  
128 until RNA extraction.

129

### 130 ***In vivo* infection experiments using leptospire**

131 Male and female C57BL/6J mice (7- to 10-week old) were used in this study and were obtained from  
132 Janvier Labs (Le Genest, France). TLR5 deficient mice (TLR5KO) in a C57BL/6J background were  
133 bred at the Institut Pasteur Paris animal facility and were previously described [18]. Outbred OF1 mice  
134 (*Mus musculus*) and golden Syrian hamsters (*Mesocricetus auratus*), initially obtained from Charles  
135 River Laboratories, were bred in the animal facility in Institut Pasteur in New Caledonia.

136 Infections of C57BL/6J mice with *L. interrogans* strains were conducted as described [22]. Just before  
137 infection, bacteria were centrifuged at room temperature for 25 min at 3250 ×g, resuspended in  
138 endotoxin-free PBS. Leptospire in 200 µL of PBS were injected via the intraperitoneal route (IP) into  
139 mice. Experiments were done with sublethal doses of pathogenic *L. interrogans*. Animals were bled at  
140 the facial vein sinus (around 50-100 µl of blood, recovered in tubes coated with 20 µl of EDTA 100  
141 mM). A drop of urine was retrieved upon first handling of mice. Animals were killed by cervical  
142 dislocation and organs frozen in liquid nitrogen before storage at -80°C or fixed in formaldehyde for  
143 histopathology.

144 Virulence of *L. interrogans* Icterohaemorrhagiae strain Verdun was maintained by cyclic passages in  
145 golden Syrian hamsters after intraperitoneal (IP) injection of the LD<sub>100</sub> at  $2 \times 10^8$  leptospire before re-  
146 isolation from blood by cardiac puncture at 4.5 days post infection, after euthanasia with CO<sub>2</sub>.

147 For *in vivo* study of *flaA* and *flaB* gene expression, 6- to 8-week old healthy animals ( $n \geq 5$  individuals  
148 per condition) were infected and experiments were carried out as previously described [21]. Briefly,

149 OF1 mice and hamsters were IP injected with  $2 \times 10^8$  virulent *L. interrogans* Icterohaemorrhagiae  
150 strain Verdun in 500 to 800  $\mu$ L of EMJH medium. After euthanasia with CO<sub>2</sub>, whole blood was  
151 rapidly collected by cardiac puncture at 24 h p.i. and conserved in PAXgene blood RNA tubes  
152 (PreAnalytiX, Qiagen) for 2 h at room temperature to allow stabilization of total RNA before storage  
153 at - 20°C until RNA extraction.

154

#### 155 **Ethics statement**

156 Animal manipulations were conducted according to the guidelines of the Animal Care following the  
157 EU Directive 2010/63 EU. All protocols were reviewed and approved (#2013-0034, and #HA-0036)  
158 by the Institut Pasteur ethic committee (CETEA #89) (Paris, France), the competent authority, for  
159 compliance with the French and European regulations on Animal Welfare and with Public Health  
160 Service recommendations.

161

#### 162 **Histology and immunohistochemistry**

163 Transversal sections of kidneys were collected and fixed in formaldehyde 4% for at least 48h at room  
164 temperature, embedded in paraffin, and 5  $\mu$ m thick sections were stained with Hematoxylin-Eosin.  
165 Immunohistochemistry was performed on dewaxed sections as described [18]. A rabbit polyclonal  
166 serum against the LipL21 (kindly provided by David Haake) was used (1/1000<sup>e</sup>). A Periodic Acid-  
167 Schiff (PAS) staining was also associated to the Lip21 immunolabeling to visualize the membranes  
168 and brush borders typical of proximal tubules.

169

#### 170 **qPCR quantification of leptospiral DNA in blood, urine and organs**

171 The leptospiral load in blood, urine and organs was determined by quantitative real-time PCR (qPCR),  
172 as described [22]. Total DNA from blood and urine (around 50  $\mu$ L) was extracted using a Maxwell 16  
173 automat with the Maxwell blood DNA and cell LEV DNA purification kits (Promega), respectively.  
174 DNA was extracted with the QIAamp DNA kit (Qiagen) from organs mechanically disrupted for 3  
175 min at 4°C with metal beads using an automat (Labomodern). Primers and probe designed in the *lpxA*  
176 gene of *L. interrogans* strain Fiocruz L1-130 [4] were used to specifically detect pathogenic

177 *Leptospira sp.* [22], using the *nidogen* gene for normalization in kidneys. qPCR reactions were run on  
178 a Step one Plus real-time PCR apparatus using the absolute quantification program (Applied  
179 Biosystems), with the following conditions for FAM-TAMRA probes: 50 °C for 2 min, 95 °C for 10  
180 min, followed by 40 cycles with denaturation at 95 °C for 15 s and annealing temperature 60 °C for 1  
181 min.

182

### 183 **Reverse and Real-time transcription PCR for cytokine gene expression**

184 Total RNA was extracted from kidneys using the RNeasy mini kit (Qiagen) and RT-qPCR were  
185 performed as described [18]. The sequences of primers and probes for IL10, RANTES, and IFN $\gamma$  have  
186 already been described [10][15]. Data were analyzed according to the method of relative gene  
187 expression using the comparative cycle threshold (Ct) method also referred to as the  $2^{(-\Delta\Delta Ct)}$  method.  
188 PCR data were reported as the relative increase in mRNA transcripts versus that found in kidneys  
189 from naive WT mice, corrected by the respective levels of Hypoxanthine phosphoribosyltransferase  
190 (HPRT) mRNA used as an internal standard.

191

### 192 **Total RNA extraction and cDNA synthesis for leptospiral *fla* genes**

193 Total RNA from blood was extracted using a PAXgene blood RNA system from PreAnalytiX  
194 (Qiagen). Total RNA from virulent *Leptospira* ( $4 \times 10^8$  bacteria) cultured *in vitro* at 30 °C and at 37 °C  
195 in EMJH medium was also extracted using a High Pure RNA Isolation kit (Roche Applied Science)  
196 following the manufacturer's recommendations. Total RNA samples were treated with DNase (Turbo  
197 DNA-Free kit; Ambion, Applied Biosystems) for elimination of residual genomic DNA. Before  
198 storage at -80°C, purified RNA was quantified by measurement of the optical density at 260 nm  
199 (OD<sub>260</sub>) using a NanoDrop 2000 spectrophotometer (Thermo Fisher Scientific), and the quality of  
200 nucleic acids was verified by measurement of the OD<sub>260</sub>/OD<sub>280</sub> ratio. Then, 1  $\mu$ g of total RNA was  
201 reverse transcribed using a Transcriptor First Strand cDNA synthesis kit (Roche Applied Science) and  
202 the provided random hexamer primers for the mix preparation, on a GeneAmp PCR system 9700

203 instrument (Applied Biosystems) with the following program: 10 min at 25°C; 30 min at 55°C; and 5  
204 min at 85°C. The cDNA synthesized was conserved at -20°C until quantitative PCR (qPCR) assays.

205

### 206 **Quantitative PCR and FlaA and FlaB expression analysis**

207 After cDNA synthesis, qPCR assays were performed using primers purchased from Eurogentec  
208 (Seraing, Belgium; Table 1) and specific for the gene coding for the *flaA* and *flaB* subunit genes.

209 Primers were designed using LightCycler Probe Design Software (version 2.0; Roche Applied  
210 Science) or the free online Primer3 software (version 0.4.0) using available sequences retrieved from

211 GenBank (NCBI). Amplifications were carried out on a LightCycler 480 II instrument using

212 LightCycler 480 software (v. 1.5.0) and a LightCycler 480 SYBR green I master kit (Roche Applied

213 Science) according to the provided instructions. The amplification program was as follow: a first hot

214 start (95°C for 10 min) and 50 cycles of an activation step at 95°C for 5 s, an annealing step at 62°C

215 for 5 s, and an elongation step at 72°C for 8 s. Each sample was run in duplicate. A single acquisition

216 of fluorescence for calculation of the Ct was processed during the elongation step. The specificity of

217 amplification was verified by size visualization of the PCR product (Table 1) after electrophoresis on a

218 1.8% agarose gel (Sigma-Aldrich) in 1% TBE (Tris-borate-EDTA) for 30 to 45 min at 120 V and by

219 analysis of the melting curves of the PCR products (melting temperatures,  $T_m$ , in Table 1). All Ct

220 values were analyzed using the qbase<sup>PLUS</sup> software (Biogazelle, Belgium).

221 For *in vivo* infections, the level of expression of each target gene was normalized to the levels of

222 *lipL21*, *lipL36*, and *lipL41* gene, previously validated as reference genes in our conditions [23]. The

223 relative normalized expression ratio was then calculated as the ratio of the *in vivo* to the *in vitro*

224 expression level of bacteria cultured at 30°C. For the *in vitro* bacterial cultures, level of expression of

225 *flaB* genes was normalized to the level of *lipL41* housekeeping gene (Normalized relative quantities).

226

### 227 **Generation of Bone Marrow-derived Macrophage (BMM)**

228 Bone marrow cells (BMC) were obtained as recently described [22]. Briefly, mice were euthanized,

229 femurs dissected, cleaned, and the heads were cut off. BMC were flushed out using a 21G needle to

230 inject culture medium through the bones. BMC were centrifuged (300 g, 5 minutes) and treated with



231 Red Blood Cell Lysis Buffer (Sigma-Aldrich) for 10 minutes, followed by PBS washing. BMC were  
232 counted, and  $5 \times 10^6$  cells seeded in 100-cm<sup>2</sup> cell culture dishes in 12 mL RPMI supplemented with  
233 10% fetal calf serum (Lonza), 1X non-essential amino acids (NEEA, Gibco), 1 mM sodium pyruvate  
234 (complete medium) supplemented with 1X Antibiotic/Anti-mycotic solution (Gibco) and 10% L929  
235 cell supernatant to provide a source of M-CSF1. Cells were incubated for 7 days at 37°C with 5% CO<sub>2</sub>.  
236 At day 3, 5 mL of the same medium was added. At day 7, the medium was removed, and 3 mL of cell  
237 dissociation buffer (Gibco) was added to harvest the bone marrow macrophages (BMMs). BMMs  
238 were collected by scrapping, centrifuged, enumerated and seeded in 96-well plates at a density of  
239  $2 \times 10^5$  cells per well in complete medium without antibiotics. BMMs were rested for 2 to 4 h and  
240 stimulated for 24 h with different leptospiral strains, live or heat-killed for 30 min at 100 °C, at a MOI  
241 of 1:100, or 1:50 or with 100 ng/mL of controls [Standard Flagellin from *Salmonella typhimurium*  
242 (FLA) and LPS *E. coli* ultra-purified (both from InvivoGen)]. The keratinocyte-derived (KC/CXCL1)  
243 cytokine was measured in cell supernatants 24 h post-stimulation, by ELISA using Duo-Set kits (R&D  
244 Systems), according to the supplier's instructions.

245

#### 246 **TLR5/ NF-κB assay in human epithelial cell line HEK-blue-KD-TLR5**

247 Human embryonic kidney TLR5 knock-down cells (HEK-Blue-KD-TLR5 cells, Invivogen) were used  
248 for the *in vitro* experiments. In these HEK-BLUE cells, the activation of NF-κB drives the expression  
249 of the alkaline phosphatase enzyme that induces a color shift from pink to blue of the chromogenic  
250 substrate in the HEK-Blue Detection Media (Invivogen). These cells were cultured in complete  
251 DMEM medium composed of DMEM GlutaMAX (Gibco) with 1 mM sodium pyruvate (Gibco), 1X  
252 NEEA (Gibco) and 10 % V/V heat-inactivated foetal calf serum (Hi FCS, Gibco). On day 1, cells  
253 were detached by 1 min incubation in cell dissociation buffer (Gibco) followed by gentle flush with  
254 medium. Cells were then seeded in 22.1 cm<sup>2</sup> cell culture dishes (TPP) at less than 30 % confluence  
255 and incubated overnight at 37 °C, 5 % CO<sub>2</sub>. Cell transfections were performed on day 2, whilst the  
256 cells remained under 60 % confluence and with a total amount of 3 µg of DNA per dish. For each dish,  
257 between 100 ng to 1 µg of pUNO1-humanTLR5, pUNO1-murineTLR5 (Invivogen), pcDNA3.1-  
258 bovine TLR5 [24] or the corresponding empty vector was used, complemented up to 3 µg with

259 pcDNA3.1. The transfection reagent 1X FuGENE HD (Promega) in serum free OptiMEM (Gibco)  
260 was incubated during 25 min with the DNA followed by transfection of the cells according to the  
261 manufacturer's instruction. On day 3, transfected HEK-Blue-KD-TLR5 cells were stimulated in  
262 96-wells plates. Briefly, 20  $\mu$ L Flagellin from *Salmonella typhimurium* as a control (Standard FLA-ST  
263 (Invivogen) or leptospires resuspended in PBS at a MOI between 1:50 to 1:200 were added in empty  
264 wells. Transfected HEK-Blue-KD-TLR5 cells were then gently flushed in PBS and resuspended in  
265 HEK-Blue Detection Media (Invivogen) at  $2.8 \times 10^5$  cells/mL. 180  $\mu$ L of cell suspension,  
266 corresponding to 50 000 cells, were then added on top of the agonists in each well and plates were  
267 incubated for 24h at 37°C, 5 % CO<sub>2</sub>. In each well, the activation of NF- $\kappa$ B through TLR5 was  
268 assessed by absorbance measurements at 630 nm. All heat treatments were performed under agitation  
269 at 300 rpm and in PBS on the diluted leptospires preparations right before addition in the wells.  
270 Proteinase K treatments of leptospires (from *Tritirachium album*, Qiagen) were performed under  
271 agitation at 300 rpm in PBS for 2h at 37°C, to avoid killing the leptospires. Such treatment was  
272 followed by heat inactivation of the enzyme and bacteria at 100°C for 30 min. The non-inactivated  
273 fraction and mock treatment without leptospires were also tested on HEK-Blue-KD-TLR5 cells.  
274 Treatment of live leptospires was performed with 100  $\mu$ g/mL of the human cathelicidin LL37  
275 (Invivogen) in PBS for 2 hours.

276

### 277 ***In silico* analyses of the flagellin protein sequences**

278 All the *in silico* analyses were performed using either Uniprot or GeneBank available sequences. All  
279 corresponding accession numbers are mentioned in the figure legends. Amino acid sequence  
280 homology percentage (identity) was obtained using BLAST. Alignments of the sequences were  
281 performed with MEGA X [25] and using the Clustal method. Structural predictions based on amino  
282 acid sequences were obtained using the Phyre2 [26] and figures colored and modified with Chimera  
283 [27].

284

### 285 **Statistical analyses**

286 Statistical analyses were performed using non-parametric Mann-Whitney test, that does not assume a  
287 normal distribution of the samples, and stars were attributed according the following p values: \*  
288  $p < 0.05$ ; \*\*  $p < 0.01$ .

289

## 290 **Results**

### 291 **TLR5 deficiency does not modify the course of leptospirosis in mice**

292 To study the potential involvement of the TLR5 receptor in the host defense against leptospires, we  
293 used a murine model of leptospirosis and compared the susceptibility of C57BL/6/J (WT) mice *versus*  
294 *tlr5* knock-out (TLR5KO) mice in the same genetic background after intraperitoneal infection with a  
295 sublethal dose of  $10^7$  *L. interrogans* (serovar Manilae strain L495). Leptospiral loads were measured  
296 by q-PCR in blood and urine (Figure 1A) and organs (Figure 1B) 3 days, 7 days and 15 days post-  
297 infection (p.i). As previously described [18; 28], leptospires were present in blood, liver, spleen, lungs  
298 and kidney at day 3 p.i (Figure 1A and 1B). At day 7 p.i, leptospires were detected in urines, but not in  
299 blood or kidneys, similar as previously observed [29]. At day 15 p.i, leptospires were present in urine  
300 and kidneys. No difference of leptospiral loads could be observed between WT and TLR5KO mice in  
301 blood, urine or organs. In addition, mRNA expression of pro-(IFN $\gamma$ ), anti-(IL-10) inflammatory  
302 cytokines and RANTES chemokine measured by RT-qPCR at day 3 and 7 p.i in the kidneys did not  
303 differ between WT and TLR5KO mice (Figure 1C). Altogether these results suggest that the presence  
304 of TLR5 does not play a major role in the murine defense against experimental leptospirosis.

305

### 306 **TLR5 deficiency does not change the localization of leptospires in kidneys**

307 Because TLR5 is expressed in epithelial renal cells and plays an important role to control bacteria  
308 responsible for urinary tract infection [13], we hypothesized that the absence of TLR5 could impact  
309 the localization of leptospires in the kidneys or the induced nephritis [18; 28]. We used the  
310 bioluminescent derivative MFLum1 of *L. interrogans* Manilae strain L495 to visualize leptospires in  
311 the kidneys 15 days post-infection. Similar as described for the bacterial loads measured by q-PCR,  
312 levels and shape of emitted light, reflecting live bacteria [29], were equivalent between WT and

313 TLR5KO infected mice (Figure 2A). Using immunohistochemistry, we further investigated the  
314 presence of leptospire in kidneys of WT and TLR5KO mice. Minimal inflammatory cellular  
315 infiltrates were noted with similar incidence and severity in the cortex of both WT and TLR5KO  
316 infected mice (Figure 2B a-f), whereas no inflammation was observed in the naive WT control.  
317 Labeling of leptospire with an anti-LipL21 antibody [17] revealed a low number of *Leptospira*-  
318 infected tubules in the renal cortex, as already described [18] (Figure 2B g-i). In histological sections  
319 of the kidney stained with Periodic Acid-Schiff, we only found leptospire in some proximal tubules,  
320 associated with the PAS positive microvilli of the brush border at the luminal surface of the tubular  
321 epithelium, as previously described in rats [30]. No differences were observed between WT and  
322 TLR5KO mice (Figure 2B j-k). Altogether these results suggest that TLR5 does not play any major  
323 role in host protection against *L. interrogans* Manilae L495 infection in mice and that leptospire may  
324 therefore escape the TLR5 response.

325

### 326 **Live pathogenic leptospire do not signal through murine and human TLR5 *in vitro***

327 Bone marrow derived macrophages (BMMs) from WT and TLR5KO mice were infected with  
328 different live strains of *L. interrogans* and the production of the KC chemokine was measured by  
329 ELISA 24h p.i in the cellular supernatants. We did not find any difference between both genotypes  
330 (Figure 3A), which correlated with the *in vivo* experiments and indeed strongly supporting the  
331 observation that live leptospire were not recognized through the murine TLR5.

332 We assessed next whether the escape of recognition by murine TLR5 is a species-specific  
333 phenomenon. Indeed, we previously highlighted PRR species-specificities of leptospiral MAMPs  
334 recognition, such as murine TLR4 receptor that recognizes the leptospiral LPS, whereas human TLR4  
335 does not, and conversely the human NOD1, but not the murine NOD1 is able to sense leptospiral  
336 muopeptides [17; 31]. We therefore transfected HEK-Blue-KD-TLR5 cells with either human TLR5,  
337 murine TLR5, or an empty control vector. No signal corresponding to murine or human TLR5-  
338 mediated NF- $\kappa$ B activation was obtained upon infection with different live *L. interrogans* strains at  
339 MOI of 10 and 100 (date not shown) and neither at a high MOI of 200 (Figure 3B), which suggested  
340 that leptospire also escape the human TLR5 recognition.

341

### 342 **Heat-killed leptospires signal through human TLR5 but barely through murine TLR5**

343 The specificity of TLR5 activation is usually assessed by inactivating and denaturing a potential  
344 ligand through heat-inactivation. Here, we observed that Manilae L495 and Icterohaemorrhagiae  
345 Verdun strains inactivated at 100°C for 30 min induced equivalent levels of KC in WT and TLR5KO  
346 murine BMMs, which was consistent with the results obtained using live bacteria (Figure 3A). In  
347 contrast, the heat-killed Copenhageni Fiocruz strain L1-130 unexpectedly induced less cytokines in  
348 TLR5KO than in WT BMM (Figure 3C), suggesting that an agonist present in the inactivated Fiocruz  
349 strain could be recognized by murine TLR5. Unexpectedly, heat-killed leptospires from all serovars  
350 strongly activated HEK-Blue-KD-TLR5 transfected with human TLR5 (Figure 3D). Further, despite  
351 the fact that both Manilae L495 and Icterohaemorrhagiae Verdun strains did not stimulate murine  
352 TLR5, a slight activation signal was observed with the Copenhageni Fiocruz L130 strain, which was  
353 consistent with the cytokine results in BMMs (Figure 3C). The experiment was performed in parallel  
354 with an empty plasmid, showing that these results were indeed specific to TLR5 activation, and did  
355 not depend on a different NF- $\kappa$ B activation pathway (Figure 3D). Altogether these unexpected results  
356 suggested that only heat-killed leptospires can signal through human TLR5, but not or only barely  
357 through murine TLR5, providing a new example of species-specificity of PRR recognition of  
358 leptospiral MAMPs.

359

### 360 **A heat-resistant protein from heat-killed leptospires signals through TLR5**

361 To our knowledge, our results showing TLR5 activation using heat-inactivated leptospires has never  
362 been described before. Thus, we first ensured that the signal observed was indeed attributed to  
363 flagellin-like proteins of leptospires interacting with TLR5. Since only stimulation with heat-killed  
364 bacteria resulted in TLR5 signaling, we anticipated that a proteinase K treatment would destroy the  
365 protein involved in the signaling. Therefore, we treated live and heat-killed Fiocruz L1-130 leptospires  
366 with proteinase K, followed or not by heating at 100 °C for 30 min to inactivate the enzyme. We  
367 stimulated TLR5 transfected HEK-Blue-KD-TLR5 with these preparations and a mock control  
368 without bacteria. Although the proteinase K treatment had no effect on live bacteria, it decreased the

369 signal on heat-killed bacteria (Figure 4A). In contrast to live bacteria treated with proteinase K and  
370 subsequently heated, which resulted in a strong TLR5 activation, TLR5 signaling was not restored in  
371 heat-killed bacteria treated with proteinase K, suggesting that the proteinase K had digested all TLR5  
372 agonists (Figure 4A). This experiment confirmed the protein nature of the agonist present in heat-  
373 killed leptospires, which was not affected by proteinase K activity in live bacteria. We hypothesize  
374 that in live leptospires, the periplasmic location of the endoflagella would protect the flagellin subunits  
375 from proteinase K digestion, thus potentially explaining why live bacteria do not signal through TLR5  
376 and are not affected by the enzyme (Figure 4B).

377 Next, we investigated the unusual thermostability of the TLR5 agonist, by incubating live Fiocruz  
378 L1-130 leptospires at different temperatures (from 30°C and up to 99°C) and for different durations  
379 (from 30 min and up to 8 h) (Figure 4C) before stimulation of HEK-Blue-KD-TLR5 transfected with  
380 human TLR5. Interestingly, after 8 h incubation at 30°C (the optimal temperature for leptospires’  
381 growth *in vitro*) or at 37 °C (the host temperature), we did not observe any TLR5-dependent signaling.  
382 Of note, at 56°C, the usual temperature to inactivate leptospires [15; 18] whilst keeping the leptospiral  
383 shape integrity, a signal started after 3 hours of incubation, but even 8 hours were not enough to get a  
384 full TLR5 signaling. At 70°C, the temperature classically used to depolymerize the *Salmonella*’s  
385 flagellum filament [10], a 30 min incubation was sufficient to stably activate TLR5 for 8 hours. The  
386 signal observed with leptospires incubated for 30 min at 85°C disappeared after 8 hours, whereas the  
387 positive signal observed after heating the bacteria at 99°C for 30 min disappeared after 3h of heating  
388 (Figure 4C). These results confirmed the protein nature of the TLR5 agonist of leptospires, since the  
389 activation can be extinguished by heating the bacteria for an extended time at high temperature.  
390 Interestingly, these data suggest that, like other bacteria, the leptospiral flagellum depolymerizes at  
391 70°C, which allows for the release of active monomers recognized by the human TLR5. However, in  
392 contrast with the *Salmonella* FliC, which is inactivated after 15 min at 100°C, leptospiral flagellins  
393 appear to be highly resistant to heating.

394

395 **Antimicrobial peptides destabilize live leptospires and unmask a TLR5 signal**

396 Since we revealed the potential for TLR5 recognition of leptospire by heating at high non-  
397 physiological temperatures, we wondered whether leptospire could signal through TLR5 after being  
398 destabilized or killed with antibiotics or antimicrobial peptides. Antibiotic treatments (at MIC  
399 concentrations) including gentamicin, azithromycin and penicillin G, the latter being known to target  
400 the cell wall, did not induce any TLR5 signal (data not shown). Next, we used cathelicidin LL37, an  
401 antimicrobial peptide which has been shown to be active against leptospire [32], and that was  
402 recently associated with a better outcome in human patients with leptospirosis [33]. Furthermore,  
403 LL37 has also been shown to prevent death in young hamsters experimentally infected with the  
404 Fiocruz L1-130 strain [33]. In our study, live *L. interrogans* Manilae L495 bacteria pre-treated with  
405 LL37 induced a modest but significant TLR5 signal (Figure 5A). Another antimicrobial peptide, the  
406 bovine Bmap28 has been described to be 50 to 100 times more efficient in killing leptospire than  
407 LL37 [32]. We thus tested whether bovine TLR5 could recognize leptospire. Interestingly, although  
408 as already published [24], bovine TLR5 did not recognize the *Salmonella* flagellin that we used as a  
409 positive control of activation, we found that it recognized heat-killed Fiocruz L1-130 (Figure 5B). The  
410 magnitude of the bovine TLR5 signaling was intermediate between the weak response observed with  
411 murine TLR5 and the response seen when using human TLR5 (Figure 5B). However, rather than  
412 reflect real differences between bovine and human TLR5, this lower response may actually result from  
413 the heterologous expression system of bovine TLR5 in the human HEK cell system, that has been  
414 shown to impact the responsiveness [34]. Therefore, we anticipate that Bmap28 could allow for a  
415 TLR5 signaling in bovines infected with *Leptospira* spp.

416

#### 417 ***In silico* analyses of potential TLR5 binding sites within leptospiral FlaBs**

418 Two leptospiral *flaA* (*flaA1* and *flaA2*) and four *flaB* genes (*flaB1* to *flaB4*) have been annotated in the  
419 *L. interrogans* genomes according to their similarity with the *Salmonella* flagellin (FliC), the two  
420 families sharing respectively around 25 % and 38 % identity at the protein level with FliC (Figure 6A).  
421 Structural studies recently showed that the FlaBs subunits constitute the core of the flagellum, and the  
422 other subunits constitute an asymmetric outer sheath, with FlaBs interacting with FlaAs on the  
423 concave site and with FcpA on the other side of the curvature. FcpA and FcpB associate in a lattice

424 forming the convex part of the endoflagellum [8] (Sup Figure 2A). Using the BLAST-P software, we  
425 found that the different FlaB subunits from the *L. interrogans* Fiocruz strain share 57% to 72% of  
426 identity and most probably result from gene duplication events (Sup Figure 1A). Similar results were  
427 obtained with the saprophytic *L. biflexa* Patoc strain (Sup Figure 1A). We then used the Phyre2  
428 software to model the FlaBs structures according to their primary amino acid sequences, using the  
429 FliC protein sequence as a base. FliC folds in four regions D0 to D3, forming an inverted L shape  
430 (Figure 6B), with both N-term and C-term in the D0 domain. Region D1, in the inner face of the  
431 monomer, is involved in the interaction of FliC with the leucine-rich repeat (LRR) domains of TLR5  
432 via 3 binding sites (Figure 6A, 6B and Sup Figure 2B)[35; 36]. There is also a region in the C-term  
433 part of the D0 domain that is not directly involved in the binding to TLR5 but important for the  
434 stabilization of the TLR5 dimers upon binding to FliC (Figure 6A, 6B and Sup Figure 2B) [37]. All  
435 FlaB subunits from *L. interrogans* and *L. biflexa* harbor orthologues of the D0 and D1 domains of FliC,  
436 while missing the D2 and D3 domains (Figure 6C, and data not shown). We also checked whether  
437 FlaA1 or FlaA2 could have a structure mimicking the D2-D3 domains of FliC, but leptospiral FlaA1  
438 and FlaA2 looked globular, mainly presenting  $\beta$  sheets and do not resemble the missing domains  
439 (Figure 6C). Interestingly, we found that the FlaBs possessed the 3 conserved sequences important for  
440 TLR5 binding in the D1 domain (Figure 6C and 6D). Then, we compared the different pathogenic *L.*  
441 *interrogans* and the saprophytic *L. biflexa* Patoc I strain and found that the four FlaBs, although  
442 distinct from each other (Sup Figure 1A), were highly conserved in the consensus regions of the TLR5  
443 binding domains in D1 (99 to 100% identity among the different pathogenic serovars, the Patoc FlaBs  
444 being less conserved (Figure 6D)). We also found in FlaBs the consensus in the D0 domain involved  
445 in the flagellin /TLR5 complex stabilization (Figure 6C). We compared the leptospiral FlaB sequences  
446 in these 3 consensus binding TLR5 regions with other spirochetes, *Borrelia burgdorferi* and  
447 *Treponema* spp, the latter known to signal via TLR5 when FlaBs are expressed as recombinant  
448 proteins [38] and also with bacteria known to dodge the TLR5 response such as *Helicobacter pylori*  
449 [39] and *Bartonella bacilliformis* [10], presenting variations in those consensus sequences of their  
450 flagellins (Sup Figure 3A). In addition, we also found this FlaB region to be 100 % conserved in a  
451 panel of major species of *Leptospira* circulating all over the world, including potential human



452 pathogens, such as *L.borgpeterseni*, *L. kirschneri*, *L. noguchii*, *L. weilii*, *L. santarosai*, as well as *L.*  
453 *licerasiae*, belonging to another clade of species of lower virulence [2](Sup Figure 3B). These  
454 alignments show that the TLR5 binding site region is highly conserved in all leptospiral FlaBs.  
455 Therefore each of the four FlaB subunit could potentially signal through TLR5, since leptospiral FlaBs  
456 share the 2 first consensus with TLR5 activating bacteria and the different residue observed in the  
457 consensus number 3 is also present in TLR5-activating *Treponema* flagellins [40].

458

### 459 **FlaBs, but not FIAs or Fcps induce TLR5 signaling**

460 To confirm the putative role of the FlaBs subunits in inducing TLR5 signaling, we used different  
461 mutants deficient either in FlaAs, FlaBs or Fcps subunits to stimulate HEK-blue reporter cells  
462 transfected with human TLR5. Of note, both *flaAs* and *fcps* genes are in operons, and the *flaA2* mutant  
463 lacks both FlaA1 and FlaA2 subunits [3]. Likewise, the *fcpA* mutant lacks both FcpA and FcpB  
464 subunits [5; 6]. Our results showed that the TLR5 signaling induced with the heat-killed *fcpA* mutants  
465 in Patoc I or in Fiocruz L1-130 was equivalent to the activation observed with parental strains (Figure  
466 7A and 7B). TLR5 signaling was not changed with the *flaA2* mutant in Manilae L495, however the  
467 *flaB1* mutant induced a lower activation (Figure 7C). We also observed a decrease of the TLR5  
468 response with the Patoc I *flaB4* mutant (Figure 7D). These results suggest that the FlaB subunits, but  
469 not the FlaAs or Fcps, are involved in the TLR5 signaling, and are in line with sequence comparison  
470 data.

471

### 472 **FlaBs mRNA are upregulated in stationary phase**

473 Proteomic and high throughput mass spectrometry performed with the Fiocruz L1-130 strain grown in  
474 EMJH have shown that all four *flaBs* genes were expressed and part of the leptospiral flagellum [7].  
475 To test whether leptospire could differently regulate the FlaB expression, cultures of leptospire were  
476 harvested after 3 to 6 days, or after 10 to 14 days of culture corresponding to exponential growth or  
477 stationary phase, respectively. mRNA was purified and RT-qPCR performed with specific primers of  
478 the four leptospiral *flaB* genes. The results suggested that the mRNA expression of the different *flaB*  
479 subunits might vary during bacterial growth *in vitro* (Figure 8A). Indeed, the gene expression of all

480 *flaB* subunits seems to be upregulated at the stationary phase in the three serotypes, although only the  
481 *flaB3* mRNA expression was statistically higher in stationary phase (Figure 8A). Of note, and different  
482 from other strains, the L495 Manilae *flaB1* mRNA was undetectable at the exponential phase, and  
483 barely expressed at the stationary phase (Figure 8A). We then compared the human TLR5 activation  
484 in presence of the Manilae *flaB1* mutant (the only available *flaB* mutant among pathogenic strains) at  
485 the exponential *versus* the stationary phases. In both growth phases, the heat-killed *flaB1* mutant  
486 signaled less than the parental Manilae L495 (Figure 8B), confirming that the FlaB1 subunit likely  
487 participates in the signaling as already observed (Figure 7C). However, even though the *flaB1* mutant  
488 seems to better signal at the stationary phase compared to the exponential phase, no statistical  
489 differences could be observed between both phases (Figure 8B). Since in prokaryotes the process from  
490 transcription to translation is very rapid, these results of *flaB* mRNA expression together with TLR5  
491 sensing suggest an unanticipated upregulation of the FlaB subunits at the stationary phase or  
492 conversely a downregulation at the exponential phase that could potentially influence the TLR5  
493 sensing.

494

#### 495 **In vivo downregulation of *flaBs* mRNA**

496 To further investigate whether the FlaB regulation could be relevant or play a role *in vivo*, mice and  
497 hamsters were infected with the virulent Verdun strain, and blood was sampled 24 hours post infection  
498 to purify total mRNAs. In parallel, *in vitro* cultures were performed in EMJH either at 37°C, the host  
499 temperature or at 30°C, the usual leptospiral growth culture conditions. First, the expressions of *flaA1*  
500 and *flaA2* were not different at 30°C and 37°C, nor between the hamsters and mice, nor between the *in*  
501 *vitro* conditions and *in vivo* conditions (Figure 8C, left panel). However, the *flaBs* expressions were  
502 strikingly different, with a weaker expression of the FlaB subunits in the hosts compared to the *in vitro*  
503 cultures at 30°C. In the hamsters, all subunits appeared to be equally downregulated compared to their  
504 expression in EMJH cultures at 30°C, although in the mouse, FlaB1 seems to be more downregulated  
505 than the other subunits, but this was not statistically significant (Figure 8B, right panel). These data  
506 strongly suggest that 24h post-infection, leptospires downregulate the expression of their FlaBs  
507 subunits in animal blood, which as a consequence could participate in the TLR5 evasion.

508

## 509 **Discussion**

510 We showed in this study that live leptospire largely escaped the TLR5 recognition. However, TLR5  
511 agonists were unexpectedly released after boiling for 30 min, and we further showed their unusual  
512 thermoresistance. We determined that the TLR5 activity relied as expected on the FlaB subunits,  
513 known to form the core of the flagella and share with FliC some structural features and consensus  
514 domains of TLR5 binding. Our results also highlighted a species-specificity of the TLR5 recognition  
515 of the leptospiral FlaBs, and potentially differences among strains. Indeed, we evidenced that human  
516 and bovine TLR5 recognized heat-killed leptospire, although the mouse TLR5 did not sense the  
517 *Icterohaemorrhagiae* Verdun and Manilae L495 strains, but recognized the Copenhageni Fiocruz strain  
518 L1-130, although scantily. We found *in vitro* that the TLR5 recognition was enhanced at the stationary  
519 phase, potentially due to an upregulation of the expression of FlaB monomers, especially the FlaB3.  
520 Finally, we showed that antimicrobial peptides that are active against live bacteria allowed for their  
521 signaling through TLR5. Finally, we showed that leptospire downregulated the FlaBs gene  
522 expression in blood from both resistant mice and susceptible hamsters, suggesting a mechanism of  
523 immune evasion.

524

525 Our results showing the lack of TLR5 signaling by live bacteria despite the involvement of the FlaB  
526 subunits in the TLR5 recognition could have been anticipated considering the peculiarities of the  
527 leptospiral endoflagella. Indeed, the recent published structure of the filament of the leptospiral  
528 flagella showed that the FlaBs form the core and are wrapped inside a lattice composed of both FlaAs,  
529 FcpA and FcpB subunits [8], therefore hiding the FlaB monomers. Then, the localization of the  
530 flagella inside the bacteria adds a supplemental layer of protection from the host innate immune  
531 system. In addition, in *Enterobacteriaceae*, a unique FliC monomer polymerizes to form 11  
532 protofilaments that together assemble to constitute one flagellum's filament. The consensus sites for  
533 TLR5 recognition in the flagellin FliC are localized at stacking sites between the flagellin monomers  
534 and therefore are not accessible when the filament is formed. Hence, when polymerized, the  
535 interaction domain of FliC with TLR5 is masked, therefore whole flagella do not signal through TLR5,

536 [37; 41; 42]. We found that this was also the case for leptospire, with a TLR5 signaling occurring  
537 only after 30 min of heating at 70°C, temperature also observed to depolymerize the enterobacterial  
538 filament [10]. Similarly, intact purified periplasmic flagella from *Treponema denticola* were not able  
539 to activate TLR5 [43].

540  
541 The absence of TLR5 response in the mouse model was surprising because i) it was shown that  
542 neutralizing TLR5 antibodies decreased the cytokine response of whole human blood upon infection  
543 with *L. interrogans* [44], ii) we showed here that antimicrobial peptides could degrade live leptospire  
544 and induce human TLR5 recognition, and iii) we previously demonstrated that leptospire were killed  
545 and cleared from blood during the first days following infection in mice [29], suggesting the release of  
546 free flagellin subunits that could have stimulated the TLR5 response. Hence, our study highlights a  
547 species-specificity of the TLR5 recognition since murine TLR5, unlike human TLR5, was unable to  
548 detect the Manilae L495 and Icterohaemorrhagiae Verdun strains. This was unexpected since murine  
549 TLR5 is usually more flexible and able to accommodate more different agonist structures compared to  
550 human TLR5 [45], similar as seen for murine TLR4 [31]. However, the heat-killed Copenhageni  
551 Fiocruz L1-130 strain was recognized by murine TLR5, although to a lesser extent than compared to  
552 human TLR5. The weak response seen in murine TLR5 activation is consistent with our previous  
553 study showing equivalent levels of IL1 $\beta$  release in BMMs from WT and TLR5KO mice infected with  
554 live Fiocruz L1-130 strain, although stimulation with heat-killed leptospire triggered less IL1 $\beta$  in  
555 TLR5KO BMMs [15]. Interestingly, we previously showed by microdissection of the mouse kidney  
556 that TLR5 is expressed in renal tubules, mostly in the distal tubules and in the collecting duct cells  
557 while almost not expressed in the proximal tubules [13]. Therefore, our data suggest that the  
558 localization of leptospire in proximal tubules could be a favorable environment for the Fiocruz L1-  
559 130 strain because of the lack of TLR5 recognition, which potentially could favor its chronic  
560 colonization of the mouse kidney [18; 46]. However, since the Manilae L495 strain is not recognized  
561 by murine TLR5, we may speculate that it could be advantageous in other animals. Hence, we  
562 highlighted an important feature of bovine immune response toward leptospire. Heat killing  
563 *Leptospira* revealed their ability to induce a bovine TLR5-dependent response. Antimicrobial peptides

564 also affected live leptospires in a way allowing for the release of TLR5 agonists and subsequent  
565 signaling. Of note, bovine antimicrobial peptides are known to have strong potency against leptospires  
566 [32]. Hence, we infer that the bovine TLR5 response may be important to fight leptospires in cattle.  
567 Together, we may speculate that these observed differences in TLR5 sensing between animals and  
568 also between the three strains of *L. interrogans* tested, could, at least partly, be responsible for shaping  
569 the preferential species-specificity adaptation of *Leptospira* serovars to their hosts [47].

570  
571 Interestingly, we also showed a very high stability of the leptospiral filaments and FlaB proteins that  
572 perfectly resist heating up to 100°C for 30 min and 85°C for 3 hours. This unusual thermoresistance of  
573 the leptospiral flagella is reminiscent the hydrophobic and very highly glycosylated pili of  
574 hyperthermophilic Archaea [48]. Glycosylation also occur in bacteria. Although we do not know  
575 whether the *Treponema* FlaBs are particularly stable, it has recently been shown that the FlaBs of  
576 *Treponema denticola* were glycosylated with an unusual novel glycan [49]. Mass spectrometry  
577 analysis of these glycopeptides revealed FlaBs glycosylation by O-linkage at multiple sites near the  
578 D1 domain, in the very conserved region of bacterial flagellins that interacts with TLR5  
579 (encompassing the end of consensus 2, Sup Figure 4A)[49]. Interestingly, we found that these atypical  
580 glycosylation targets sequences in *Treponema*, notably the two motifs “VEVSQL” and “DRIAS” are  
581 almost 100% conserved in the FlaB1, FlaB2 and FlaB3 of pathogenic and saprophytic *Leptospira* (Sup  
582 figure 4B and 4C) [49]. In addition, this consensus was also 100% conserved in leptospiral FlaB1  
583 from other major species involved in leptospirosis in animals and humans (Sup Figure 4D).  
584 Interestingly, the two serine residues were substituted in the *L. interrogans* FlaB4 and FlaB from  
585 *Borrelia burgdorferi* (Sup Figure 4C), which might suggest a lack of glycosylation of the leptospiral  
586 FlaB4 subunit and *B. burgdorferi* FLA<sub>B</sub>. The authors hypothesized that in *Treponema spp.* these  
587 peculiar glycosylation could impair the TLR5 signaling of *Treponema*. Our study suggests, if these  
588 post-translational modifications exist in leptospires, that they would not impair the TLR5 recognition  
589 at least in human and bovine TLR5. Rather we may speculate that they could participate in the  
590 thermoresistance of the filament structure.

591

592 In the other spirochetes, the filament structure differs from the leptospiral one since in *Treponema* and  
593 *Borrelia spp.* the FcpA subunits are absent. Furthermore in *Borrelia* only one copy of FlaA and FlaB  
594 compose the filament [50; 51]. The stability of the leptospiral filament is most probably due to the  
595 particular association and spatial arrangement of the different FlaBs and to their recently described  
596 asymmetric interactions with FlaA and with FcpA [8]. Whether the four FlaBs are randomly dispersed  
597 along the filament or would have specific structural functions remains to be studied. However, our  
598 results were obtained in the context of the whole bacteria. It would have been interesting to test  
599 individual leptospiral FlaB subunits to understand whether the high stability results of intrinsic  
600 properties of the individual FlaBs. However, our attempts to express recombinant FlaB monomers  
601 have failed. We cannot exclude a caveat in our cloning strategy but it was quite surprising considering  
602 that *T. denticola* and *T. pallidum* FlaB were expressed as stable recombinant proteins that were able to  
603 signal through TLR5 in THP1 monocytes or in human keratocytes, respectively [38]. One hypothesis  
604 could be that the FlaBs that encompass a different shape than FliC would need to be stabilized by  
605 polymerization into the complex filament structure.

606  
607 The respective role of the leptospiral FlaB1, FlaB2, FlaB3 and FlaB4 proteins remains unknown. The  
608 Phyre 2 models suggest that the four FlaBs structures are identical, which explains why the precise  
609 roles of the different FlaBs in the core could not be addressed in a recent structural study [8]. The only  
610 information available about differences in the four subunits comes from a proteomic study [7] that  
611 finds all four FlaB subunits in Fiocruz L1-130 strain cultured in EMJH at 30°C, suggesting that all  
612 subunits were present in the filaments with different relative abundance of FlaB subunits, with each  
613 bacterium containing 12000 copies of FlaB1, 2000 copies of FlaB2, 300 copies of FlaB3 and 3500  
614 copies of FlaB4 [7]. We tested the expression of each of the four FlaBs mRNA in EMJH cultures and  
615 found that all the subunits were expressed in the Verdun and Fiocruz L1-130 strains. However, the  
616 relative mRNA levels of the different FlaB subunits did not match the data obtained in the proteomic  
617 study, since for example the relative mRNA quantities of *flaB3* seems to be higher than *flaA4* at the  
618 stationary phase. Furthermore, in Manilae L495, we observed a strikingly weak expression of FlaB1  
619 compared to the other *L. interrogans* tested, potentially suggesting a strain-specific regulation of FlaB

620 subunits. Of note, the *flaB1* expression was upregulated at the stationary phase in Fiocruz L1-130,  
621 which could potentially explain the striking difference between the Manilae L495 strain that was not  
622 recognized by the mouse TLR5 whereas the Copenhageni L1-130 strain exhibited a better recognition,  
623 despite the fact that all their FlaBs are almost identical and 100% conserved in the TLR5 consensus  
624 binding domains. In addition, the absence of one FlaB subunit in the FlaB4 mutant of *L. biflexa* Patoc  
625 I, which has been shown to impair the filament formation [19], also impairs the TLR5 signaling. A  
626 decreased TLR5 signaling was also observed with the Manilae FlaB1 mutant although the impact of  
627 this mutant on filament formation has not yet been studied. However, in both cases the TLR5 signal  
628 was not abolished, suggesting that despite the lack of observed motility and filaments, some other  
629 FlaB subunits were still expressed and able to signal through TLR5. This is indeed in agreement  
630 with our *in silico* analyzes, suggesting that all FlaB subunits can signal theoretically through TLR5.

631  
632 The fact that we found a striking downregulation of FlaBs, but not of FlaAs, in the blood of mice and  
633 hamsters 24 h post-infection with the Verdun strain, suggests that a regulation of the FlaBs expression  
634 could favor an escape from the TLR5 immune surveillance upon infection. However, it remains to be  
635 demonstrated that the global downregulation of FlaBs expression that we observed *in vitro* at the  
636 exponential phase correlates indeed with a decrease in TLR5 recognition. In animal's blood, the  
637 downregulation of the FlaB expression could make sense to avoid the TLR5 response. It would have  
638 been interesting to check the expression of the FlaBs in *Leptospira* colonizing the kidney of animals.  
639 However, if amenable in the blood of animals, the purification of leptospire mRNA in kidneys is still  
640 challenging. The only example of published renal transcriptome dualseq analysis of *L. interrogans*  
641 (Fiocruz L1-130) infection in mice could only detect 29 leptospiral genes [52], among them LipL32,  
642 the major lipoprotein and interestingly, one flagellin gene, *flaB4* (LIC11531), suggesting that the  
643 mRNA levels of FlaB4 were quite high, and potentially higher than the other FlaBs mRNA. As a  
644 whole, these results suggest a complex regulation of the leptospiral FlaB subunits that deserves further  
645 investigation. Interestingly, it was shown in another spirochete *Brachyspira hyodysenteriae* that the  
646 flagellin genes are transcribed by different transcription factors, with sigma 28 regulating the *flaB1*  
647 and *flaB2* genes, whereas the *flaA* and *flaB3* genes are controlled by sigma70. The authors suggest that

648 the relative ratio of the flagellin proteins could play a role in the stiffness of their flagellar filament  
649 and consequently that this regulation may play a role in motility [53]. The regulation of FlaBs in  
650 leptospire that harbor an even more complex flagellar filament is an interesting question that remains  
651 to be studied.

652  
653 Interestingly, the leptospiral FlaBs share with the flagellin of *Bacillus spp*, that is also able to signal  
654 via TLR5, a similar structure made of the D0 and D1 domains of FliC and lacking the D2 and D3  
655 domains [54]. Of note, the D2 and D3 domains of FliC are highly variable and responsible for the  
656 strong antigenicity of flagellins in *Enterobacteriaceae* [10]. Flagellin is known to be a potent vaccine  
657 adjuvant, however the antigenicity of the D2 and D3 domains can be a problem when booster  
658 immunizations are done. To circumvent this issue, several strategies have been recently proposed. The  
659 first consisted in using a FliC devoid of the D2 and D3 domains [14], and the second to use the  
660 *Bacillus* flagellin as an expression platform [54]. Likewise, we may speculate in the case of *Leptospira*  
661 *spp* that upon *in vivo* killing and exposure of FlaB subunits, the lack of D2 and D3 domains could be  
662 advantageous to limit the antibody response. Hence, the peculiar structure of FlaBs could also  
663 participate in the adaptive immune evasion

664  
665 In conclusion, we showed here that pathogenic *Leptospira* largely escape recognition by TLR5. Other  
666 bacteria such as *Helicobacter pylori* have been shown to escape the TLR5 response through  
667 modification of the amino residues in the D0 or D1 regions of flagellin subunits [39], but leptospire  
668 seem to have developed a different escape strategy. Indeed, our data demonstrate that the endoflagella  
669 play a role in the escape from TLR5 surveillance, which has never been shown before and might hold  
670 true for other spirochetes. We also evidenced regulatory mechanisms of *FlaB* genes expression that  
671 may also play a role in this immune evasion and have important consequences since TLR5 ligation has  
672 a potent adjuvant role in immunity.

673

674 **Acknowledgements**



675 We thank Brigitte David-Watine for critical reading of the manuscript. We are grateful to Marie-  
676 Estelle Soupe-Gilbert for her participation in the design of primers used for the quantification of  
677 flagellar subunits gene expression.

678 This study received funding from the French Government's Investissement d'Avenir program,  
679 Laboratoire d'Excellence "Integrative Biology of Emerging Infectious Diseases" (grant n°ANR-10-  
680 LABX-62-IBEID) to IGB. DB received funding from the Ecole Doctorale Frontières de l'Innovation  
681 en Recherche et Education (FIRE), Programme Bettencourt. JC was supported by a Calmette and  
682 Yersin fellowship from Institut Pasteur International network and EW by a NIH fund (R01AI121207).

683

## 684 **References**

- 685 [1] A.I. Ko, C. Goarant, and M. Picardeau, *Leptospira*: the dawn of the molecular genetics era for an  
686 emerging zoonotic pathogen. *Nat Rev Microbiol* 7 (2009) 736-47.
- 687 [2] A.T. Vincent, O. Schiettekatte, C. Goarant, V.K. Neela, E. Bernet, R. Thibeaux, N. Ismail, M.K.N.  
688 Mohd Khalid, F. Amran, T. Masuzawa, R. Nakao, A. Amara Korba, P. Bourhy, F.J. Veyrier,  
689 and M. Picardeau, Revisiting the taxonomy and evolution of pathogenicity of the genus  
690 *Leptospira* through the prism of genomics. *PLoS Negl Trop Dis* 13 (2019) e0007270.
- 691 [3] A. Lambert, M. Picardeau, D.A. Haake, R.W. Sermiswan, A. Srikram, B. Adler, and G.A. Murray,  
692 FlaA proteins in *Leptospira interrogans* are essential for motility and virulence but are not  
693 required for formation of the flagellum sheath. *Infect Immun* 80 (2012) 2019-25.
- 694 [4] F. San Martin, A.E. Mechaly, N. Larrieux, E.A. Wunder, Jr., A.I. Ko, M. Picardeau, F. Trajtenberg,  
695 and A. Buschiazzo, Crystallization of FcpA from *Leptospira*, a novel flagellar protein that is  
696 essential for pathogenesis. *Acta Crystallogr F Struct Biol Commun* 73 (2017) 123-129.
- 697 [5] E.A. Wunder, Jr., C.P. Figueira, N. Benaroudj, B. Hu, B.A. Tong, F. Trajtenberg, J. Liu, M.G. Reis,  
698 N.W. Charon, A. Buschiazzo, M. Picardeau, and A.I. Ko, A novel flagellar sheath protein,  
699 FcpA, determines filament coiling, translational motility and virulence for the *Leptospira*  
700 spirochete. *Mol Microbiol* 101 (2016) 457-70.
- 701 [6] E.A. Wunder, Jr., L. Slamti, D.N. Suwondo, K.H. Gibson, Z. Shang, C.V. Sindelar, F. Trajtenberg,  
702 A. Buschiazzo, A.I. Ko, and M. Picardeau, FcpB Is a Surface Filament Protein of the  
703 Endoflagellum Required for the Motility of the Spirochete *Leptospira*. *Front Cell Infect*  
704 *Microbiol* 8 (2018) 130.
- 705 [7] J. Malmstrom, M. Beck, A. Schmidt, V. Lange, E.W. Deutsch, and R. Aebersold, Proteome-wide  
706 cellular protein concentrations of the human pathogen *Leptospira interrogans*. *Nature* 460  
707 (2009) 762-5.
- 708 [8] K.H. Gibson, F. Trajtenberg, E.A. Wunder, M.R. Brady, F. San Martin, A. Mechaly, Z. Shang, J.  
709 Liu, M. Picardeau, A. Ko, A. Buschiazzo, and C.V. Sindelar, An asymmetric sheath controls  
710 flagellar supercoiling and motility in the leptospira spirochete. *Elife* 9 (2020).
- 711 [9] C. Werts, Interaction of *Leptospira* with the Innate Immune System. *Curr Top Microbiol Immunol*  
712 (2017).
- 713 [10] Y. Rossez, E.B. Wolfson, A. Holmes, D.L. Gally, and N.J. Holden, Bacterial flagella: twist and  
714 stick, or dodge across the kingdoms. *PLoS Pathog* 11 (2015) e1004483.
- 715 [11] A. Vijayan, M. Rumbo, C. Carnoy, and J.C. Sirard, Compartmentalized Antimicrobial Defenses  
716 in Response to Flagellin. *Trends Microbiol* 26 (2018) 423-435.
- 717 [12] M. Matusiak, N. Van Opdenbosch, L. Vande Walle, J.C. Sirard, T.D. Kanneganti, and M.  
718 Lamkanfi, Flagellin-induced NLRC4 phosphorylation primes the inflammasome for activation  
719 by NAIP5. *Proc Natl Acad Sci U S A* 112 (2015) 1541-6.

- 720 [13] M. Bens, S. Vimont, S. Ben Mkaddem, C. Chassin, J.M. Goujon, V. Balloy, M. Chignard, C.  
721 Werts, and A. Vandewalle, Flagellin/TLR5 signalling activates renal collecting duct cells and  
722 facilitates invasion and cellular translocation of uropathogenic *Escherichia coli*. *Cell*  
723 *Microbiol* 16 (2014) 1503-17.
- 724 [14] M.E. Biedma, D. Cayet, J. Tabareau, A.H. Rossi, K. Ivicak-Kocjan, G. Moreno, A. Errea, D.  
725 Souldard, G. Parisi, R. Jerala, P. Berguer, M. Rumbo, and J.C. Sirard, Recombinant flagellins  
726 with deletions in domains D1, D2, and D3: Characterization as novel immunoadjuvants.  
727 *Vaccine* 37 (2019) 652-663.
- 728 [15] S. Lacroix-Lamande, M.F. d'Andon, E. Michel, G. Ratet, D.J. Philpott, S.E. Girardin, I.G. Boneca,  
729 A. Vandewalle, and C. Werts, Downregulation of the Na/K-ATPase pump by leptospiral  
730 glycolipoprotein activates the NLRP3 inflammasome. *J Immunol* 188 (2012) 2805-14.
- 731 [16] C. Werts, R.I. Tapping, J.C. Mathison, T.H. Chuang, V. Kravchenko, I. Saint Girons, D.A. Haake,  
732 P.J. Godowski, F. Hayashi, A. Ozinsky, D.M. Underhill, C.J. Kirschning, H. Wagner, A.  
733 Aderem, P.S. Tobias, and R.J. Ulevitch, Leptospiral lipopolysaccharide activates cells through  
734 a TLR2-dependent mechanism. *Nat Immunol* 2 (2001) 346-52.
- 735 [17] G. Ratet, I. Santecchia, M. Fanton d'Andon, F. Vernel-Pauillac, R. Wheeler, P. Lenormand, F.  
736 Fischer, P. Lechat, D.A. Haake, M. Picardeau, I.G. Boneca, and C. Werts, LipL21 lipoprotein  
737 binding to peptidoglycan enables *Leptospira interrogans* to escape NOD1 and NOD2  
738 recognition. *PLoS Pathog* 13 (2017) e1006725.
- 739 [18] M. Fanton d'Andon, N. Quellard, B. Fernandez, G. Ratet, S. Lacroix-Lamande, A. Vandewalle,  
740 I.G. Boneca, J.M. Goujon, and C. Werts, *Leptospira Interrogans* induces fibrosis in the mouse  
741 kidney through Inos-dependent, TLR- and NLR-independent signaling pathways. *PLoS Negl*  
742 *Trop Dis* 8 (2014) e2664.
- 743 [19] M. Picardeau, A. Brenot, and I. Saint Girons, First evidence for gene replacement in *Leptospira*  
744 spp. Inactivation of *L. biflexa* *flaB* results in non-motile mutants deficient in endoflagella.  
745 *Mol Microbiol* 40 (2001) 189-99.
- 746 [20] P. Bourhy, H. Louvel, I. Saint Girons, and M. Picardeau, Random insertional mutagenesis of  
747 *Leptospira interrogans*, the agent of leptospirosis, using a mariner transposon. *J Bacteriol* 187  
748 (2005) 3255-8.
- 749 [21] M. Matsui, V. Rouleau, L. Bruyere-Ostells, and C. Goarant, Gene expression profiles of immune  
750 mediators and histopathological findings in animal models of leptospirosis: comparison  
751 between susceptible hamsters and resistant mice. *Infect Immun* 79 (2011) 4480-92.
- 752 [22] I. Santecchia, F. Vernel-Pauillac, O. Rased, J. Quintin, M. Gomes-Solecki, I.G. Boneca, and C.  
753 Werts, Innate immune memory through TLR2 and NOD2 contributes to the control of  
754 *Leptospira interrogans* infection. *PLoS Pathog* 15 (2019) e1007811.
- 755 [23] M. Matsui, M.E. Soupe, J. Becam, and C. Goarant, Differential in vivo gene expression of major  
756 *Leptospira* proteins in resistant or susceptible animal models. *Appl Environ Microbiol* 78  
757 (2012) 6372-6.
- 758 [24] H.J. Metcalfe, R.M. La Ragione, D.G. Smith, and D. Werling, Functional characterisation of  
759 bovine TLR5 indicates species-specific recognition of flagellin. *Vet Immunol Immunopathol*  
760 157 (2014) 197-205.
- 761 [25] S. Kumar, G. Stecher, M. Li, C. Knyaz, and K. Tamura, MEGA X: Molecular Evolutionary  
762 Genetics Analysis across Computing Platforms. *Mol Biol Evol* 35 (2018) 1547-1549.
- 763 [26] L.A. Kelley, S. Mezulis, C.M. Yates, M.N. Wass, and M.J. Sternberg, The Phyre2 web portal for  
764 protein modeling, prediction and analysis. *Nat Protoc* 10 (2015) 845-58.
- 765 [27] T.D. Goddard, C.C. Huang, E.C. Meng, E.F. Pettersen, G.S. Couch, J.H. Morris, and T.E. Ferrin,  
766 UCSF ChimeraX: Meeting modern challenges in visualization and analysis. *Protein Sci* 27  
767 (2018) 14-25.
- 768 [28] C. Chassin, M. Picardeau, J.M. Goujon, P. Bourhy, N. Quellard, S. Darche, E. Badell, M.F.  
769 d'Andon, N. Winter, S. Lacroix-Lamande, D. Buzoni-Gatel, A. Vandewalle, and C. Werts,  
770 TLR4- and TLR2-mediated B cell responses control the clearance of the bacterial pathogen,  
771 *Leptospira interrogans*. *J Immunol* 183 (2009) 2669-77.
- 772 [29] G. Ratet, F.J. Veyrier, M. Fanton d'Andon, X. Kammerscheit, M.A. Nicola, M. Picardeau, I.G.  
773 Boneca, and C. Werts, Live imaging of bioluminescent leptospira interrogans in mice reveals

- 774 renal colonization as a stealth escape from the blood defenses and antibiotics. *PLoS Negl Trop*  
775 *Dis* 8 (2014) e3359.
- 776 [30] C.R. Sterling, and A.B. Thiermann, Urban rats as chronic carriers of leptospirosis: an  
777 ultrastructural investigation. *Vet Pathol* 18 (1981) 628-37.
- 778 [31] M.A. Nahori, E. Fournie-Amazouz, N.S. Que-Gewirth, V. Balloy, M. Chignard, C.R. Raetz, I.  
779 Saint Girons, and C. Werts, Differential TLR recognition of leptospiral lipid A and  
780 lipopolysaccharide in murine and human cells. *J Immunol* 175 (2005) 6022-31.
- 781 [32] V. Sambri, A. Marangoni, L. Giacani, R. Gennaro, R. Murgia, R. Cevenini, and M. Cinco,  
782 Comparative in vitro activity of five cathelicidin-derived synthetic peptides against *Leptospira*,  
783 *Borrelia* and *Treponema pallidum*. *J Antimicrob Chemother* 50 (2002) 895-902.
- 784 [33] J.C. Lindow, E.A. Wunder, Jr., S.J. Popper, J.N. Min, P. Mannam, A. Srivastava, Y. Yao, K.P.  
785 Hacker, K. Raddassi, P.J. Lee, R.R. Montgomery, A.C. Shaw, J.E. Hagan, G.C. Araujo, N.  
786 Nery, Jr., D.A. Relman, C.C. Kim, M.G. Reis, and A.I. Ko, Cathelicidin Insufficiency in  
787 Patients with Fatal Leptospirosis. *PLoS Pathog* 12 (2016) e1005943.
- 788 [34] A. Tahoun, K. Jensen, Y. Corripio-Miyar, S. McAteer, D.G.E. Smith, T.N. McNeilly, D.L. Gally,  
789 and E.J. Glass, Host species adaptation of TLR5 signalling and flagellin recognition. *Sci Rep*  
790 7 (2017) 17677.
- 791 [35] W.S. Song, Y.J. Jeon, B. Namgung, M. Hong, and S.I. Yoon, A conserved TLR5 binding and  
792 activation hot spot on flagellin. *Sci Rep* 7 (2017) 40878.
- 793 [36] S.I. Yoon, O. Kurnasov, V. Natarajan, M. Hong, A.V. Gudkov, A.L. Osterman, and I.A. Wilson,  
794 Structural basis of TLR5-flagellin recognition and signaling. *Science* 335 (2012) 859-64.
- 795 [37] V. Forstneric, K. Ivicak-Kocjan, T. Plaper, R. Jerala, and M. Bencina, The role of the C-terminal  
796 D0 domain of flagellin in activation of Toll like receptor 5. *PLoS Pathog* 13 (2017) e1006574.
- 797 [38] M. Xu, Y. Xie, M. Tan, K. Zheng, Y. Xiao, C. Jiang, F. Zhao, T. Zeng, and Y. Wu, The N-  
798 terminal D1 domain of *Treponema pallidum* flagellin binding to TLR5 is required but not  
799 sufficient in activation of TLR5. *J Cell Mol Med* 23 (2019) 7490-7504.
- 800 [39] J.H. Kim, B. Namgung, Y.J. Jeon, W.S. Song, J. Lee, S.G. Kang, and S.I. Yoon, Helicobacter  
801 pylori flagellin: TLR5 evasion and fusion-based conversion into a TLR5 agonist. *Biochem*  
802 *Bioph Res Co* 505 (2018) 872-878.
- 803 [40] C. Jiang, M. Xu, X. Kuang, J. Xiao, M. Tan, Y. Xie, Y. Xiao, F. Zhao, and Y. Wu, *Treponema*  
804 *pallidum* flagellins stimulate MMP-9 and MMP-13 expression via TLR5 and MAPK/NF-  
805 kappaB signaling pathways in human epidermal keratinocytes. *Exp Cell Res* 361 (2017) 46-55.
- 806 [41] K. Ivicak-Kocjan, V. Forstneric, G. Panter, R. Jerala, and M. Bencina, Extension and refinement  
807 of the recognition motif for Toll-like receptor 5 activation by flagellin. *J Leukoc Biol* 104  
808 (2018) 767-776.
- 809 [42] K. Ivicak-Kocjan, G. Panter, M. Bencina, and R. Jerala, Determination of the physiological 2:2  
810 TLR5:flagellin activation stoichiometry revealed by the activity of a fusion receptor. *Biochem*  
811 *Biophys Res Commun* 435 (2013) 40-5.
- 812 [43] J. Ruby, M. Martin, M.J. Passineau, V. Godovikova, J.C. Fenno, and H. Wu, Activation of the  
813 Innate Immune System by *Treponema denticola* Periplasmic Flagella through Toll-Like  
814 Receptor 2 (vol 86, e00573-17, 2018). *Infection and Immunity* 86 (2018).
- 815 [44] M.G. Goris, J.F. Wagenaar, R.A. Hartskeerl, E.C. van Gorp, S. Schuller, A.M. Monahan, J.E.  
816 Nally, T. van der Poll, and C. van 't Veer, Potent innate immune response to pathogenic  
817 *Leptospira* in human whole blood. *PLoS One* 6 (2011) e18279.
- 818 [45] V. Forstneric, K. Ivicak-Kocjan, A. Ljubetic, R. Jerala, and M. Bencina, Distinctive Recognition  
819 of Flagellin by Human and Mouse Toll-Like Receptor 5. *PLoS One* 11 (2016) e0158894.
- 820 [46] M.F. Ferrer, E. Scharrig, N. Charo, A.L. Ripodas, R. Drut, E.A. Carrera Silva, A. Nagel, J.E.  
821 Nally, D.P. Montes de Oca, M. Schattner, and R.M. Gomez, Macrophages and Galectin 3  
822 Control Bacterial Burden in Acute and Subacute Murine Leptospirosis That Determines  
823 Chronic Kidney Fibrosis. *Front Cell Infect Microbiol* 8 (2018) 384.
- 824 [47] M. Gomes-Solecki, I. Santecchia, and C. Werts, Animal Models of Leptospirosis: Of Mice and  
825 Hamsters. *Front Immunol* 8 (2017) 58.
- 826 [48] F.B. Wang, V. Cvirkaite-Krupovic, M.A.B. Kreutzberger, Z.L. Su, G.A.P. de Oliveira, T. Osinski,  
827 N. Sherman, F. DiMaio, J.S. Wall, D. Prangishvili, M. Krupovic, and E.H. Egelman, An

- 828 extensively glycosylated archaeal pilus survives extreme conditions. *Nat Microbiol* 4 (2019)  
 829 1401-1410.
- 830 [49] K. Kurniyati, J.F. Kelly, E. Vinogradov, A. Robotham, Y.B. Tu, J. Wang, J. Liu, S.M. Logan, and  
 831 C.H. Li, A novel glycan modifies the flagellar filament proteins of the oral bacterium  
 832 *Treponema denticola*. *Molecular Microbiology* 103 (2017) 67-85.
- 833 [50] N.W. Charon, A. Cockburn, C.H. Li, J. Liu, K.A. Miller, M.R. Miller, M.A. Motaleb, and C.W.  
 834 Wolgemuth, The Unique Paradigm of Spirochete Motility and Chemotaxis. *Annu Rev*  
 835 *Microbiol* 66 (2012) 349-370.
- 836 [51] C. Li, C.W. Wolgemuth, M. Marko, D.G. Morgan, and N.W. Charon, Genetic analysis of  
 837 spirochete flagellin proteins and their involvement in motility, filament assembly, and  
 838 flagellar morphology. *Journal of Bacteriology* 190 (2008) 5607-5615.
- 839 [52] L.F. Chou, T.W. Chen, H.Y. Yang, M.Y. Chang, S.H. Hsu, C.Y. Tsai, Y.C. Ko, C.S. Huang, Y.C.  
 840 Tian, C.C.E. Hung, and C.W. Yang, Murine Renal Transcriptome Profiles Upon Leptospiral  
 841 Infection: Implications for Chronic Kidney Diseases. *J Infect Dis* 218 (2018) 1411-1423.
- 842 [53] C. Li, M. Sal, M. Marko, and N.W. Charon, Differential regulation of the multiple flagellins in  
 843 spirochetes. *Journal of bacteriology* 192 (2010) 2596-603.
- 844 [54] M.I. Kim, C. Lee, J. Park, B.Y. Jeon, and M. Hong, Crystal structure of *Bacillus cereus* flagellin  
 845 and structure-guided fusion-protein designs. *Sci Rep-Uk* 8 (2018).
- 846 [55] E.M. Carrillo-Casas, R. Hernandez-Castro, F. Suarez-Guemes, and A. de la Pena-Moctezuma,  
 847 Selection of the internal control gene for real-time quantitative rt-PCR assays in temperature  
 848 treated *Leptospira*. *Curr Microbiol* 56 (2008) 539-46.  
 849

850 **Table 1**

**TABLE 1 Details and sequence of primers used for qPCR assays**

| Gene name                  | Locus tag <sup>a</sup> | Sequence (5'-3') <sup>b</sup>                                | Tm (°C) <sup>c</sup> | Size (pb) <sup>d</sup> |
|----------------------------|------------------------|--------------------------------------------------------------|----------------------|------------------------|
| <i>flaA1</i>               | LIC10788               | (F) AGCAAGCGTATCAAGCGA<br>(R) GCATTCTCTCCTGGATAAGTG          | 81.1                 | 151                    |
| <i>flaA2</i>               | LIC10787               | (F) CGTCAGAGGATTTGATAGAGTG<br>(R) CCAGGAATTGTAGCGGT          | 80.3                 | 210                    |
| <i>flaB1</i>               | LIC11890               | (F) GCTGACGGTTCTCTCCTGAC<br>(R) ACGTTAGCCTGAGCAAGCAT         | 80.1                 | 280                    |
| <i>flaB2</i>               | LIC11889               | (F) AGCGAGACAACCTTCTCCGCCATA<br>(R) ATGAAGCAGAGAGCGGATATGGGA | 78.4                 | 150                    |
| <i>flaB3</i>               | LIC11532               | (F) GCAAGCGCAAACGCTATGAT<br>(R) ATCCCTCACACGGCTTTCTG         | 79                   | 180                    |
| <i>flaB4</i>               | LIC11531               | (F) ACTCCTTACCGGGCTTTTG<br>(R) TCACAGAGTTTGCCTTGCCA          | 78.8                 | 200                    |
| <i>lipL21</i>              | LIC10011               | (F) TGGTGAAGCTACTGCATCT<br>(R) CACCTGGAAATTTTGCG             | 80.0                 | 164                    |
| <i>lipL36</i>              | LIC13060               | (F) GGTTCAAATTGCGCTGTAG<br>(R) GCATAAACGGTTTTTCCGAG          | 80.8                 | 188                    |
| <i>lipL41</i> <sup>e</sup> |                        | (F) TTTACCAGTTGCCATAGAAGCGGC<br>(R) GGAAATCTGATTGGAGCCGAAGCA | 77.6                 | 150                    |

<sup>a</sup> Locus tag of corresponding gene sequence from *L. interrogans* serovar Copenhageni strain Fiocruz L1-130 referenced in GenBank (NCBI) under accession number NC\_005823.1 and used for primer design.

<sup>b</sup> (F) and (R), forward and reverse primer sequences, respectively.

<sup>c</sup> T<sub>m</sub>, PCR product melting temperature.

<sup>d</sup> PCR product size (in base pairs)

<sup>e</sup> As described by Carrillo-Casas et al. [55]

851

852

### 853 **Figures legends**

#### 854 **Figure 1. Lack of TLR5 does not modify the course of leptospirosis in mice**

855 Intraperitoneal infection of 7-week old female C57BL/6J (WT) mice (n= 4) and TLR5KO (n= 4) mice  
856 with 10<sup>7</sup> *L. interrogans* Manilae (strain L495). **A, B**) Bacterial loads determined by q-PCR of  
857 leptospiral DNA at different days post infection (p.i), **A**) in blood (red) and urine (yellow) in WT  
858 (empty bars) and TLR5KO mice (hatched bars) ; **B**) in organs [liver (Li), spleen (Sp), Lung (Lu) and  
859 Kidney (Ki)] from WT (black bars) and TLR5KO (blue bars). **C**) Inflammation measured in kidney by  
860 RT-qPCR of cytokines (RANTES, IL10, IFN $\gamma$ ), at 3 days p.i and 7 days p.i.

861

#### 862 **Figure 2. Lack of TLR5 does not modify the kidney colonization**

863 **A**) Tracking by live imaging (IVIS) of 7-week old C57BL/6J mice infected intraperitoneally with 10<sup>7</sup>  
864 *L. interrogans* Manilae (strain L495) bioluminescent derivative MFLum1. The imaging has been  
865 performed 15 days post-intraperitoneal infection on anesthetized mice after luciferin administration.  
866 The graph represents the mean  $\pm$  SEM of the average radiance of n = 4 mice in each group, imaged in  
867 dorsal position, and gated on the whole body. The background level of light was measured on a  
868 control TLR5KO mice injected with PBS at the time of infection.  
869 **B**) TLR5 deficiency does not modify the localization of leptospire in the proximal tubules.  
870 Histological sections and immunolabeling of the kidneys of naive TLR5KO, infected WT and  
871 TLR5KO mice 15 days p.i. **a-c**) Kidney, Hematoxylin-Eosin stain, Original magnification x2, Scale  
872 bar: 500  $\mu$ m. Cortex (Co), Medulla (Me), Papilla (Pa), Capsule (Ca). **d-f**) Kidney cortex,  
873 Hematoxylin-Eosin stain, Original magnification x10, Scale bar: 100  $\mu$ m. The stars indicate the focal

874 inflammatory infiltrates. **g-i**) Anti-LipL21 labelling of leptospire in renal tubules, Original  
875 magnification x10, Scale bar: 100  $\mu\text{m}$ . **j,k**) Double labelling LipL21/Periodic Acid-Schiff (PAS) to  
876 stain the PAS positive brush borders present in proximal tubules only. Original magnification x40,  
877 Scale bar: 25  $\mu\text{m}$ .

878

879 **Figure 3. Live pathogenic leptospire do not signal through TLR5, although heat-killed**  
880 **leptospire signal via human TLR5, but barely through murine TLR5.**

881 **A,C**) KC production measured by ELISA in the supernatants of BMM from WT (hatched empty) and  
882 TLR5KO (hatched blue) mice 24 hours p.i with different serovars of virulent *L. interrogans* at MOI  
883 50 (Manilae strain L495, Copenhageni strain Fiocruz L1-130, Icterohaemorrhagiae strain Verdun. **A**)  
884 Live bacteria, **C**) Heat killed bacteria (30 min 100 °C). LPS from *E. coli* (100 ng/mL) and unpurified  
885 FLA from *Salmonella typhimurium* (500 ng/mL) were used as controls. Each graph corresponds to one  
886 representative experiment out of 3 independent experiments. Data are expressed as the mean (+/- SD)  
887 of pooled BMM preparations from n=3 mice with 4 technical replicates, and statistics analyses were  
888 performed using non-parametric Mann-Whitney test: p<0,05\*; p<0,01 \*\*. **B, D**) Reporter NF- $\kappa$ B  
889 assays in HEK-Blue-Knock Down (KD)-TLR5 cells transfected with the human TLR5 (dark blue  
890 bars), mouse TLR5 (light blue bars), or empty plasmid (empty bars) and stimulated for 24 h with **B**)  
891 live bacteria and **D**) heat-killed bacteria at MOI 200. Flagellin from *Salmonella typhimurium* (Fla-ST)  
892 at 500 ng/mL was used as control. Data are expressed as the mean of OD630 for n=3 replicates and  
893 represent one out of 3 independent experiments.

894

895 **Figure 4. A very stable protein from leptospire signal through TLR5**

896 **A**) NF- $\kappa$ B reporter assay in HEK-Blue-KD-TLR5 cells transfected with the human TLR5 (dark blue  
897 bars), or empty plasmid (empty bars) and stimulated with live and heat killed *L. interrogans*  
898 Copenhageni strain Fiocruz (MOI 100) treated or not with Proteinase K (protK) followed or not by  
899 heat inactivation at 99°C for 30 minutes (inact or non-inact). Flagellin from *Salmonella typhimurium*  
900 (Fla-ST) at 500 ng/mL was used as control. Data are expressed as the mean OD630 of n=3 replicates  
901 and represent one out of 3 independent experiments. **B**) Chronogram of proteinase K experiments. **C**)

902 Picture of the plate 24 hours p.i. (upper panel) and corresponding graph (lower panel) of Reporter NF-  
903  $\kappa$ B assays in HEK-Blue-KD-TLR5 cells transfected with the human TLR5 or empty plasmid and  
904 stimulated with *L. interrogans* Copenhageni strain Fiocruz L1-130 at MOI 100 incubated at various  
905 temperatures during 30 min (empty bars), 3 hours (light blue bars) or 8 hours (dark blue bars). Data  
906 are expressed as the mean of OD630 of n=2 replicates and represent one out of 3 independent  
907 experiments.

908

909 **Figure 5. Antimicrobial peptides unmask the leptospiral ability to signal through TLR5, and**  
910 **bovine TLR5 recognizes leptospire**

911 **A)** Reporter NF- $\kappa$ B assay in HEK-Blue-KD-TLR5 cells transfected with the human TLR5 (dark blue  
912 bars), or empty plasmid (empty bars) and stimulated with live and heat killed *L. interrogans* strain  
913 Manilae (MOI 100) treated or not with human cathelicidin (LL37) at 100  $\mu$ g/mL for two hours before  
914 stimulation. **B)** Reporter NF- $\kappa$ B assay in HEK-Blue-KD-TLR5 cells transfected with the mouse TLR5  
915 (light blue bars), human TLR5 (dark blue bars), bovine TLR5 (black bars) or empty plasmid (empty  
916 bars) and stimulated with live and heat killed *L. interrogans* Copenhageni (strain Fiocruz L1-130).  
917 Flagellin from *Salmonella typhimurium* (Fla-ST) at 500 ng/mL was used as control. Data are  
918 expressed as the mean OD630 of n=3 replicates and represent one out of 3 independent experiments  
919 and statistics analyses were performed using non-parametric Mann-Whitney test: p<0,05\*.

920

921 **Figure 6. Comparison of leptospiral Flagellins and FliC structures in relation with TLR5**

922 **A)** Amino acid sequence homology average percentage between *Salmonella typhimurium* FliC  
923 (P06179) and *Leptospira interrogans* Copenhageni (strain Fiocruz L1-130) FlaBs (LIC11531,  
924 LIC11890, LIC11889 and LIC 11542) and FlaAs (LIC10788 and LIC10787) and primary structures of  
925 the flagellin proteins with TLR5 binding consensus. **B)** *In silico* (Phyre2 and Chimera softwares)  
926 prediction of *Salmonella typhimurium* FliC (P06179) structure with the four described domains and  
927 with positions of the TLR5 binding consensus: 1 (red), 2 (yellow) and 3 (light blue) and stabilization  
928 region (light green) highlighted. **C)** *In silico* (Phyre2 and Chimera softwares) prediction of *L.*

929 *interrogans* Copenhageni (strain Fiocruz L1-130) FlaB1 (LIC11531) with the positions of the TLR5  
930 binding consensus and stabilization region highlighted, FlaA1 (LIC10788), FlaA2 (LIC10787). **D**)  
931 Clustal (MEGA software) alignment of the amino acid sequences for the TLR5 binding consensus  
932 regions of: *Salmonella enterica* FliC (GeneBank QDQ31983.1), *L. biflexa* Patoc (strain Patoc I) FlaB1  
933 (LEPB1a1589), FlaB2 (LEPB1a2133), FlaB3 (LEPB1a2132), FlaB4 (LEPB1a1872), *L. interrogans*  
934 Copenhageni (strain Fiocruz L1-130) FlaB1 (LIC11531), FlaB2 (LIC18890), FlaB3 (LIC11889),  
935 FlaB4 (LIC11532), *L. interrogans* Manilae (strain L495) FlaB1 (LMANv2\_590023), FlaB2  
936 (LMANv2\_260016), FlaB3 (LMANv2\_260015), FlaB4 (LMANv2\_590024) and *L. interrogans*  
937 Icterohaemorrhagiae (strain Verdun) FlaB1 (AKWP\_v1\_110067), FlaB2 (AKWP\_v1\_110429), FlaB3  
938 (AKWP\_v1\_110428) and FlaB4 (AKWP\_v1\_110068).

939

#### 940 **Figure 7. FlaB flagellins are responsible for the signaling, not FlaAs nor Fcps**

941 **A-D**) NF- $\kappa$ B reporter assay in HEK-Blue-KD-TLR5 cells transfected with the human TLR5 (dark  
942 blue bars), or empty plasmid (empty bars) and stimulated at a MOI 100 with live or heat killed **A**)  
943 *L. interrogans* strain Fiocruz LV2756 or the  $\Delta$ FcpA strain, **B**) *L. biflexa* strain Patoc and  $\Delta$ FcpA  
944 mutant, **C**) *L. interrogans* strain Manilae and  $\Delta$ FlaA2 or  $\Delta$ FlaB1 mutants, **D**) *L. biflexa* strain Patoc  
945 and  $\Delta$ FlaB4 mutant. Flagellin from *Salmonella typhimurium* (Fla-ST) at 500 ng/mL was used as  
946 control. Data are expressed as the mean OD630 of n=2/3 replicates and represent one out of 3  
947 independent experiments. Statistics analyses were performed using non-parametric Mann-Whitney  
948 test: p<0,05\*, and comparing stimulated cells to the non-stimulated corresponding control.

949

#### 950 **Figure 8. FlaBs mRNA are upregulated in stationary phase and downregulated *in vivo***

951 **A**) *In vitro* mRNA expression of the different *flaB* subunits in *L. interrogans* (Manilae strain L495,  
952 Copenhageni strain Fiocruz L1-130, Icterohaemorrhagiae strain Verdun) at the exponential (exp) and  
953 stationary (stat) phase. The RTq-PCR results are expressed as the relative mRNA quantities  
954 normalized to the expression of the *lipI41* mRNA.



955 **B)** Reporter NF- $\kappa$ B assay in HEK-Blue-KD-TLR5 cells transfected with the human TLR5 (dark blue  
956 bars), or empty plasmid (empty bars) and stimulated with MOI 100 of live or heat-killed  
957 *L. interrogans* strain Manilae L495 or  $\Delta$ FlaB1 mutant in exponential and stationary phase. Flagellin  
958 from *Salmonella typhimurium* (Fla-ST) at 500 ng/mL was used as control. Data are expressed as the  
959 mean OD630 of n=3 replicates and represent one out of 3 independent experiments and statistics  
960 analyses were performed using non-parametric Mann-Whitney test:  $p < 0,05^*$ .

961 **C)** *In vivo* mRNA expression of the different *flaA* and *flaB* subunits in blood of infected mice (n=5)  
962 and hamsters (n=5), 24 h post-intraperitoneal infection with  $2 \times 10^8$  virulent *L. interrogans*  
963 Icterohaemorrhagiae strain Verdun, compared with mRNA expression in EMJH at 30°C and 37°C.  
964 Data of RTq-PCR are expressed as the ratio of mRNA quantities relatives to the condition at 30°C.  
965 Statistical analyses were performed using non-parametric Mann-Whitney test:  $p < 0,05^*$ .  $p < 0,01^{**}$ .

966

**Figure 1.** No difference in leptospiral loads and in inflammatory mediators between WT and TLR5ko mice

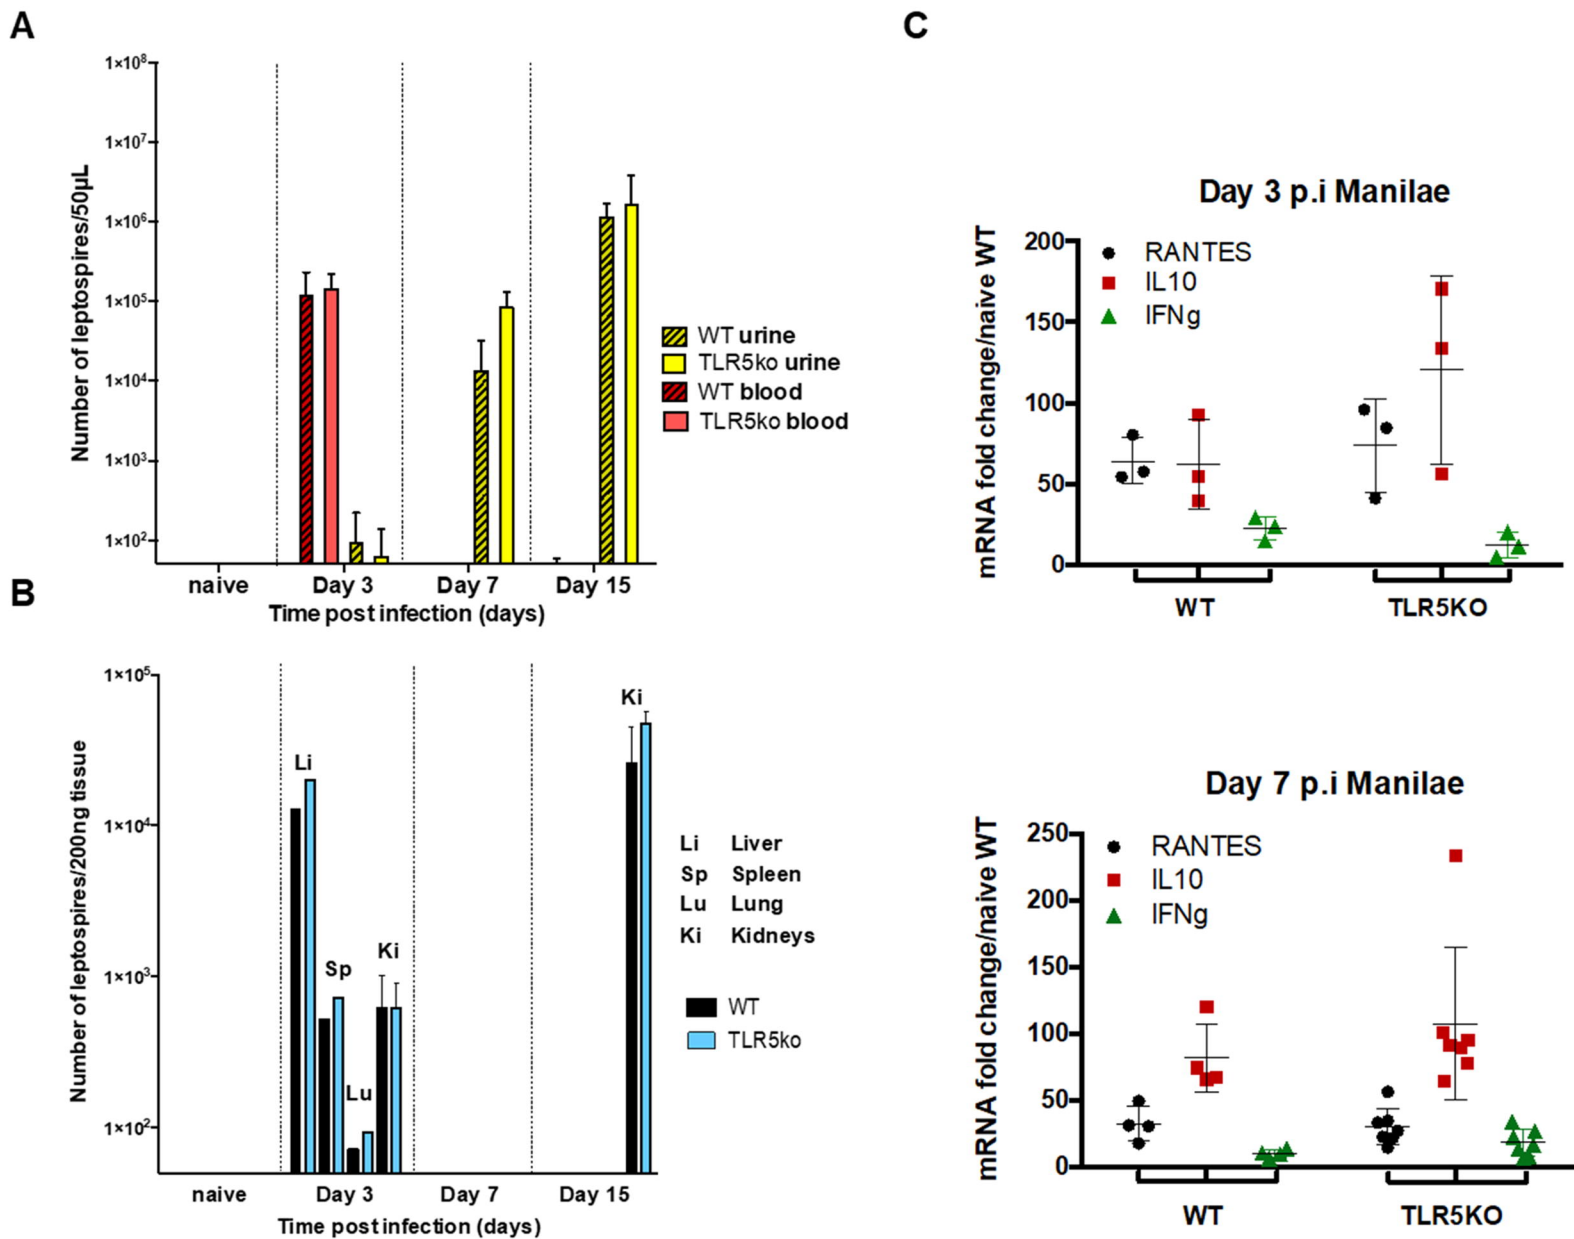

**Figure 2.** No difference in inflammation and localisation of leptospires in kidneys 15 day p.i

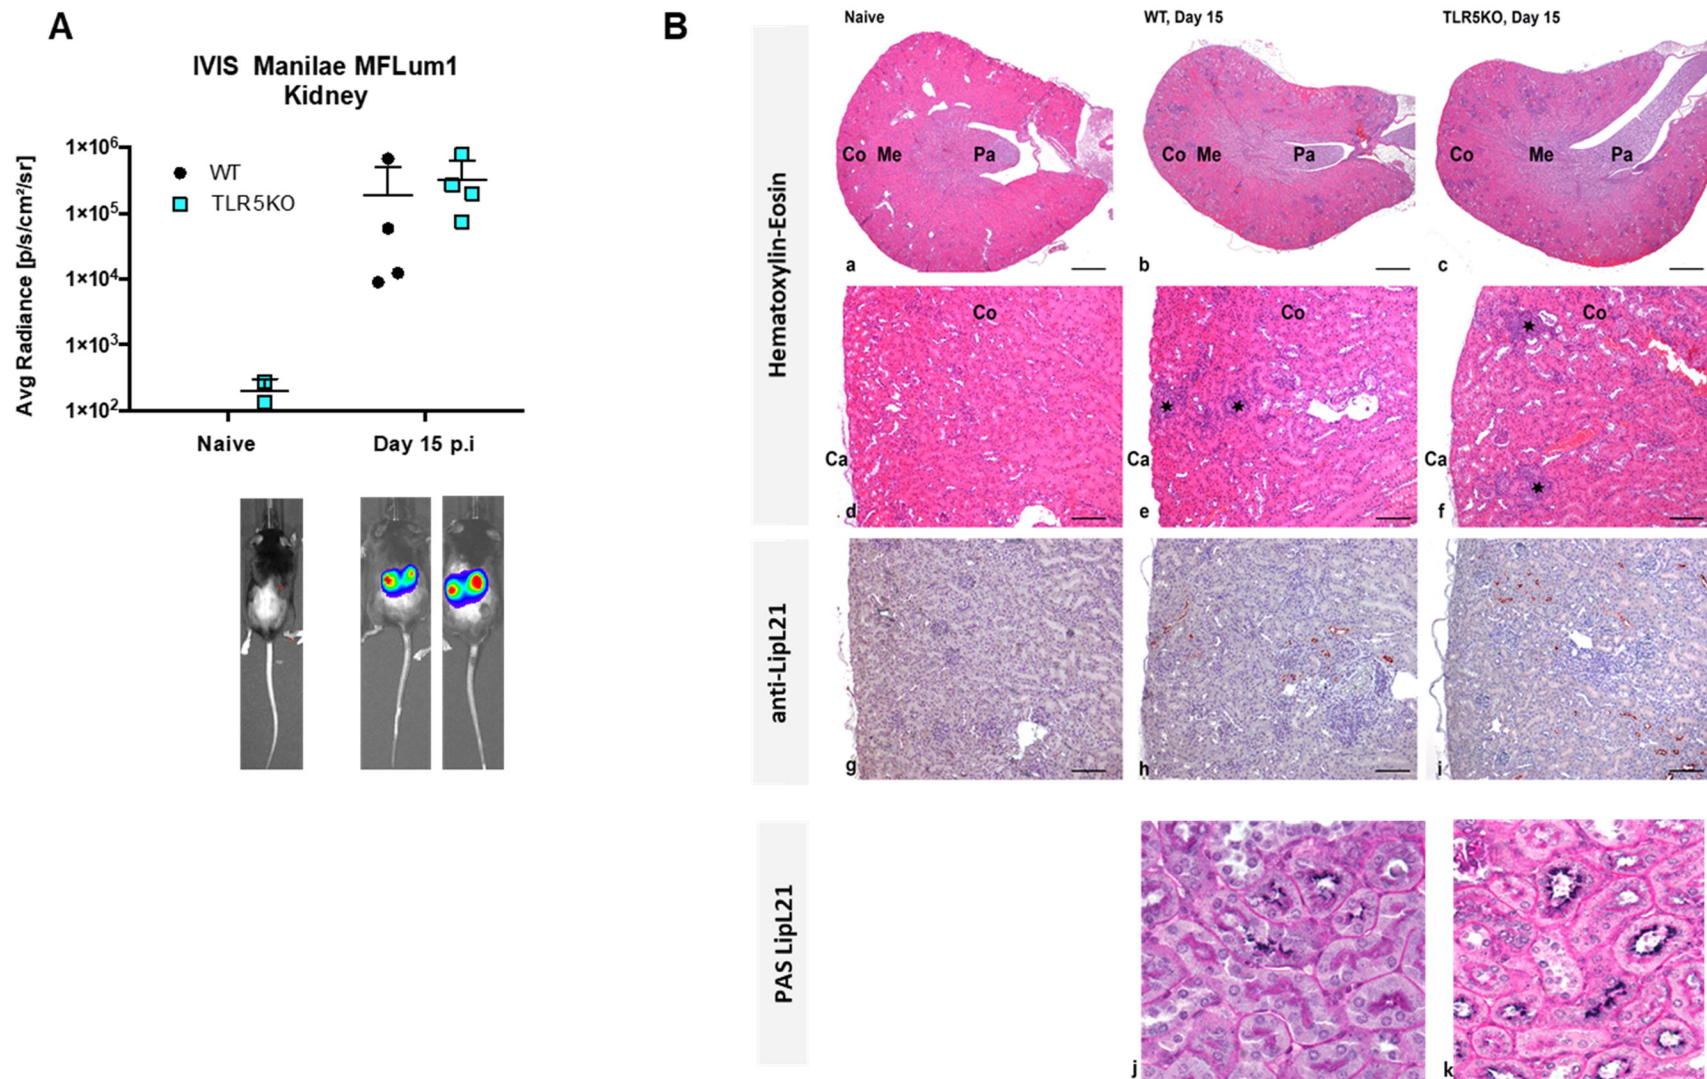

**Figure 3.** Live pathogenic leptospire do not signal through TLR5 and heat-killed leptospire signal via human TLR5, but barely through murine TLR5

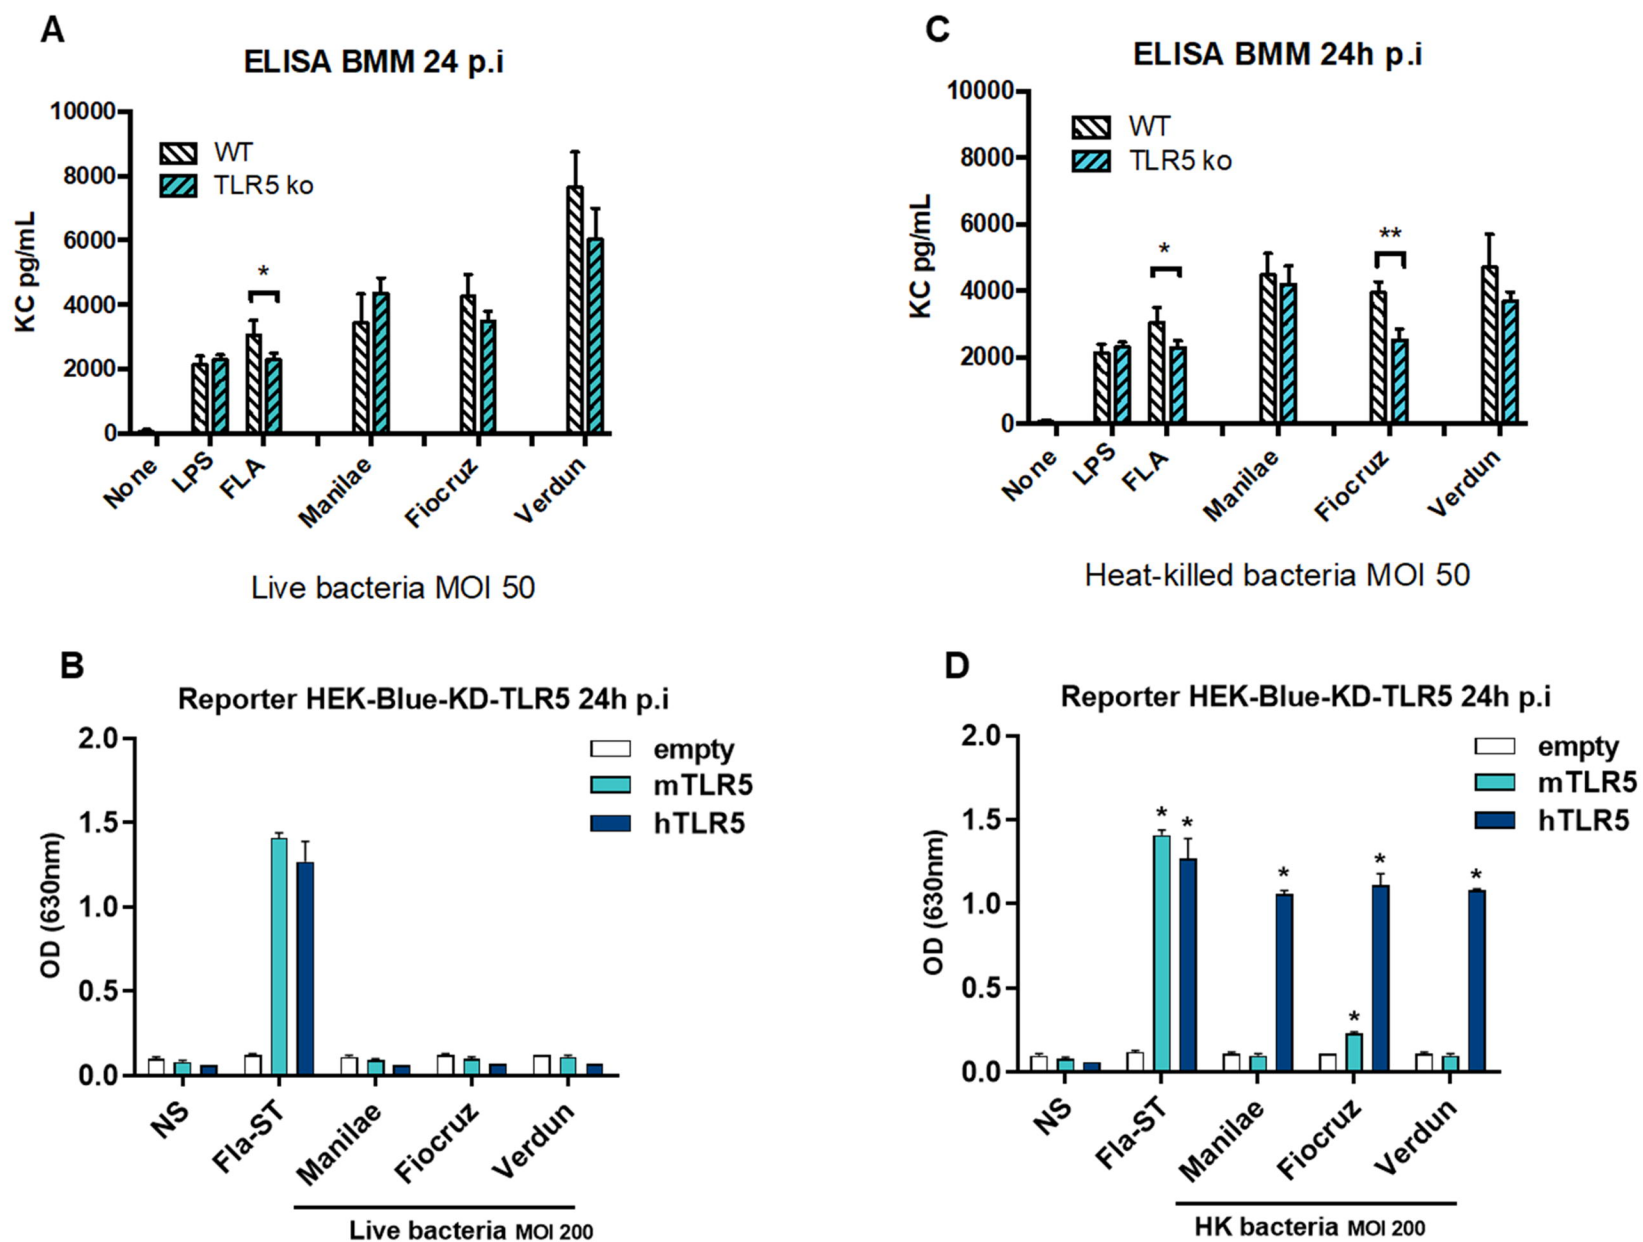

**Figure 4.** A very stable protein from leptospires signal through TLR5

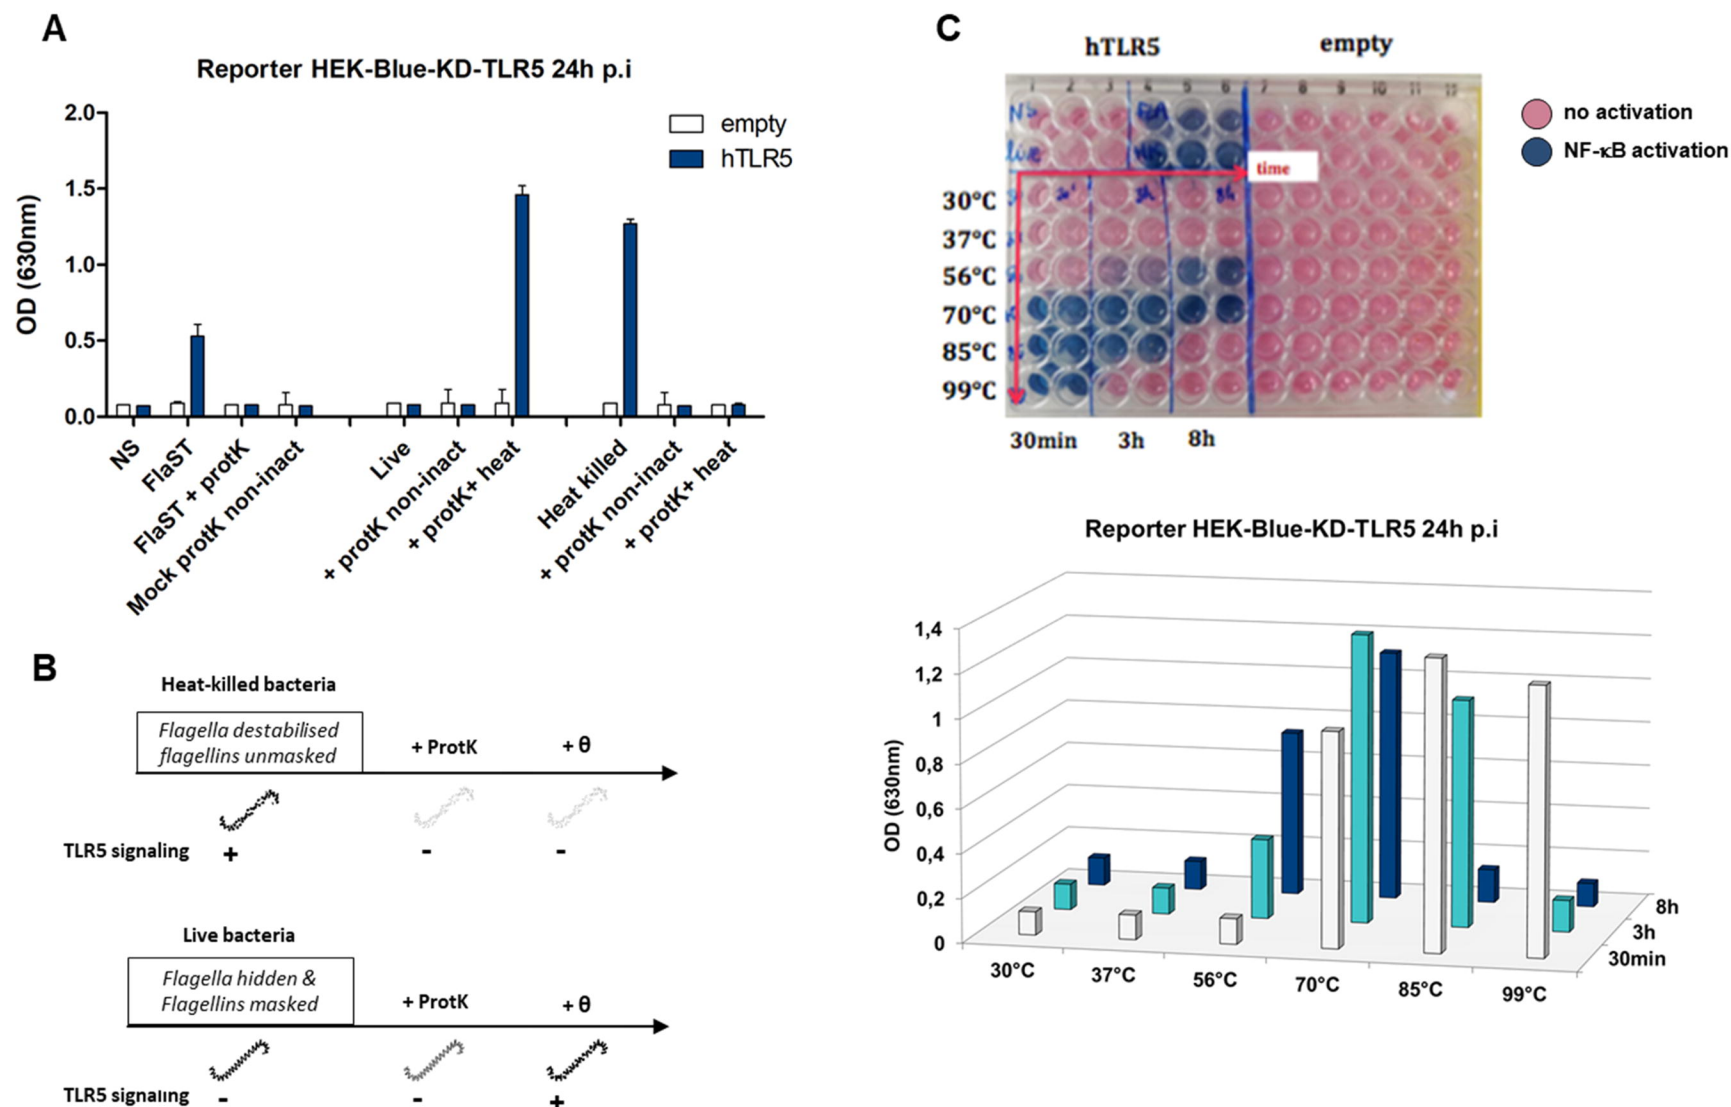

**Figure 5.** Antimicrobial peptides unmask the leptospiral ability to signal through TLR5, and bovine TLR5 recognizes leptospires

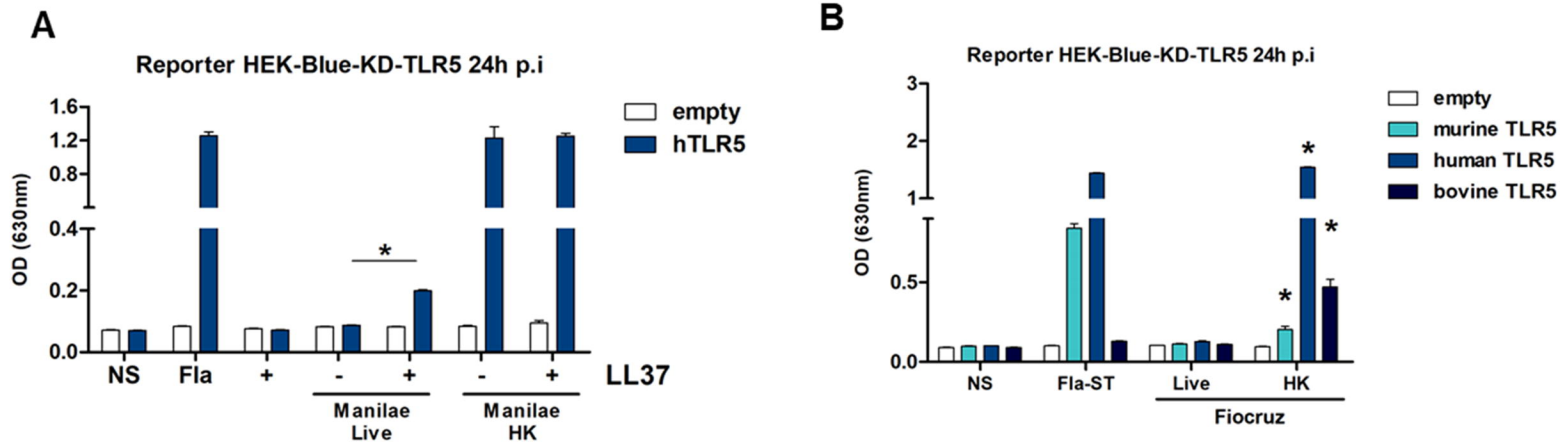

**Figure 6.** Comparison of leptospiral Flagellins and FliC structures and relation with TLR5

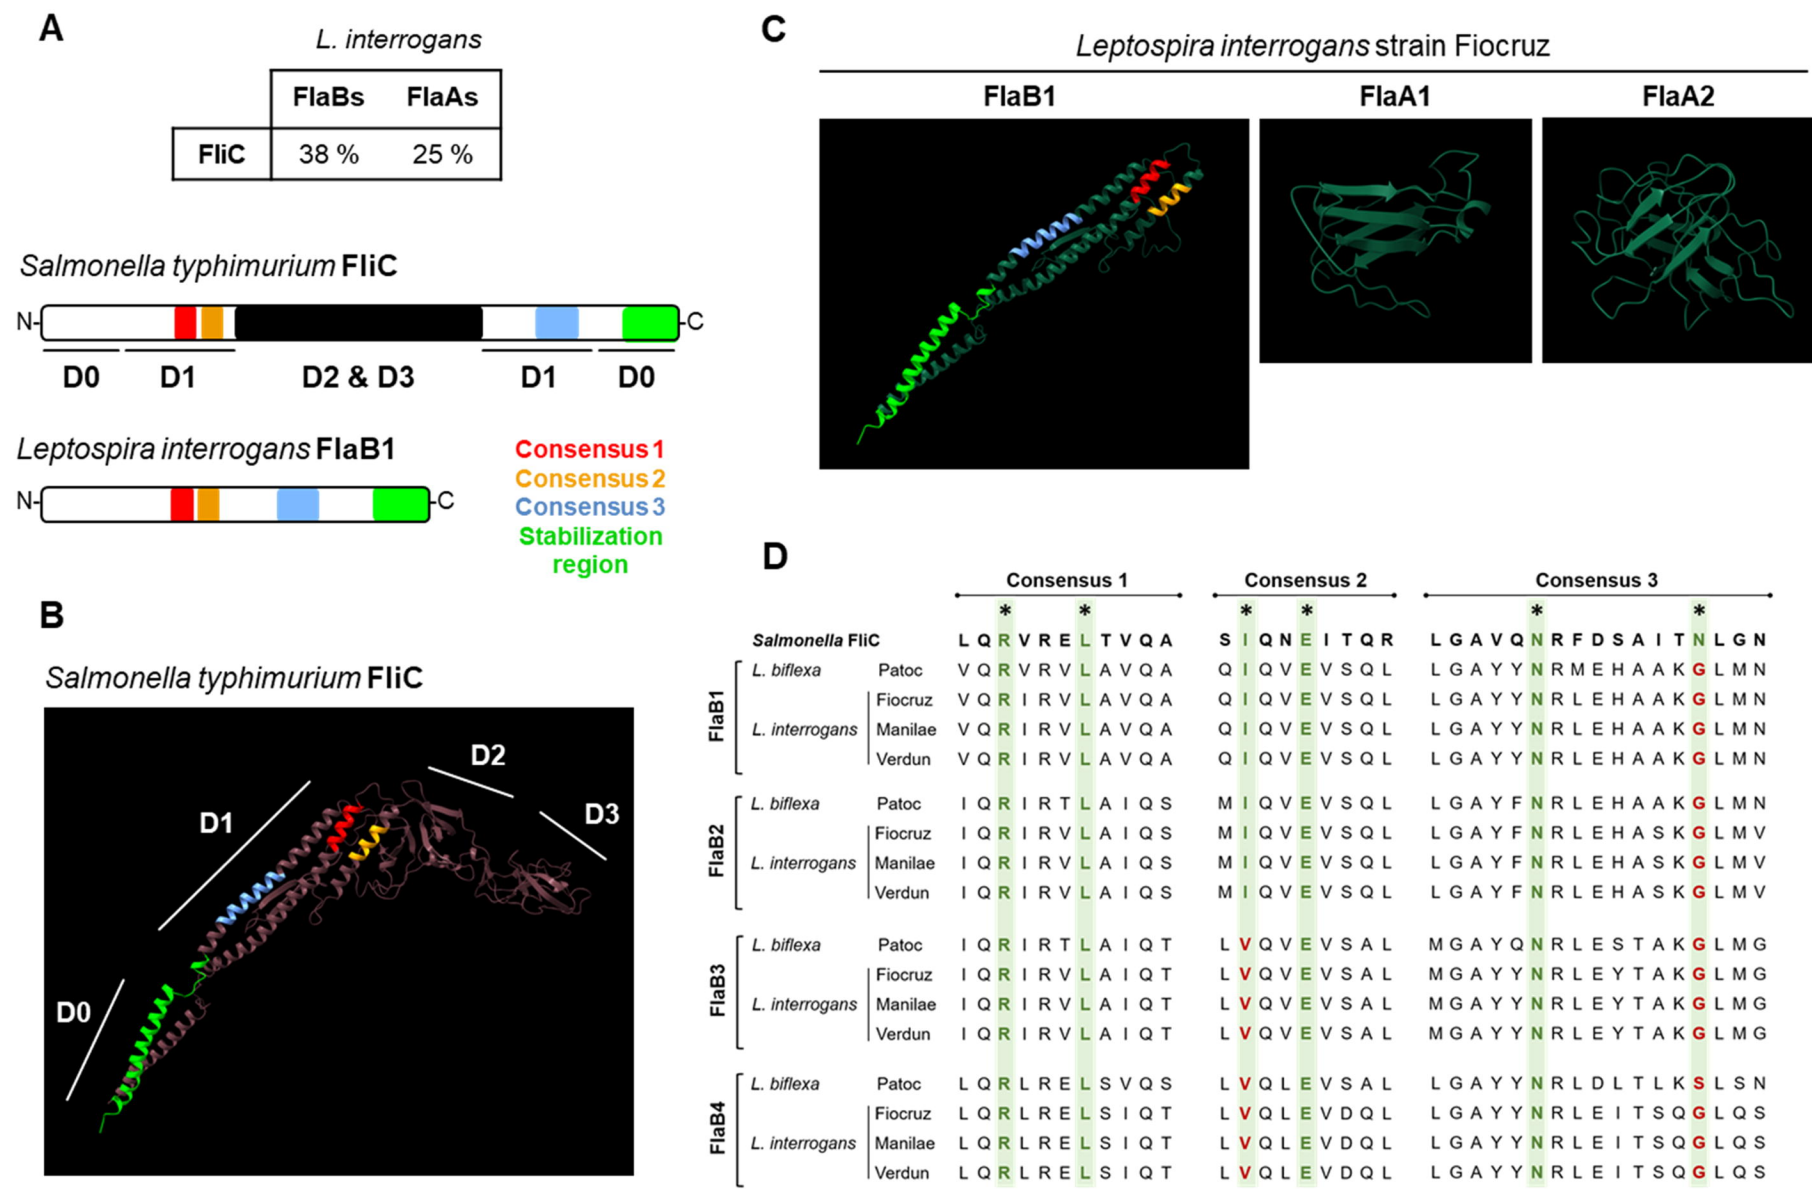

**Figure 7.** FlaB flagellins are responsible for the signaling, not FlaAs nor Fcps

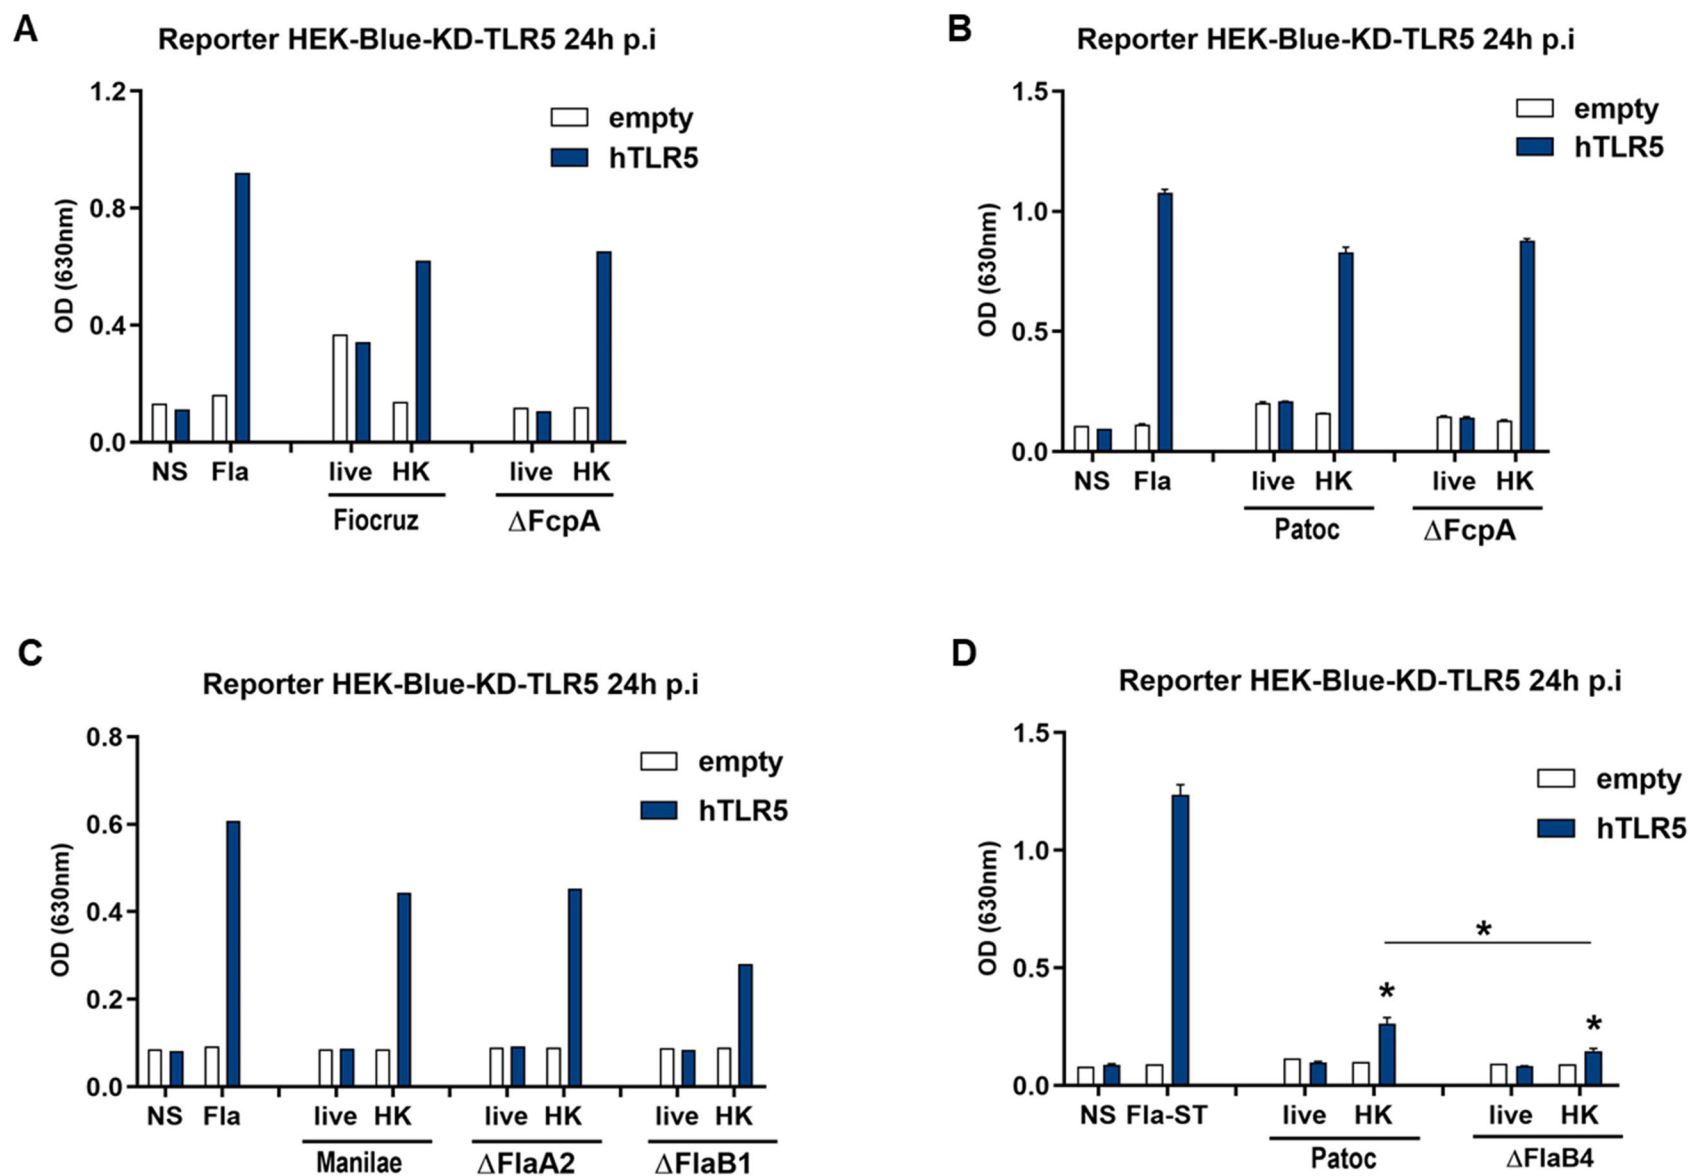



**Figure 8.** FLABs mRNA are upregulated in stationary phase, which may impact TLR5 recognition, and downregulated in vivo

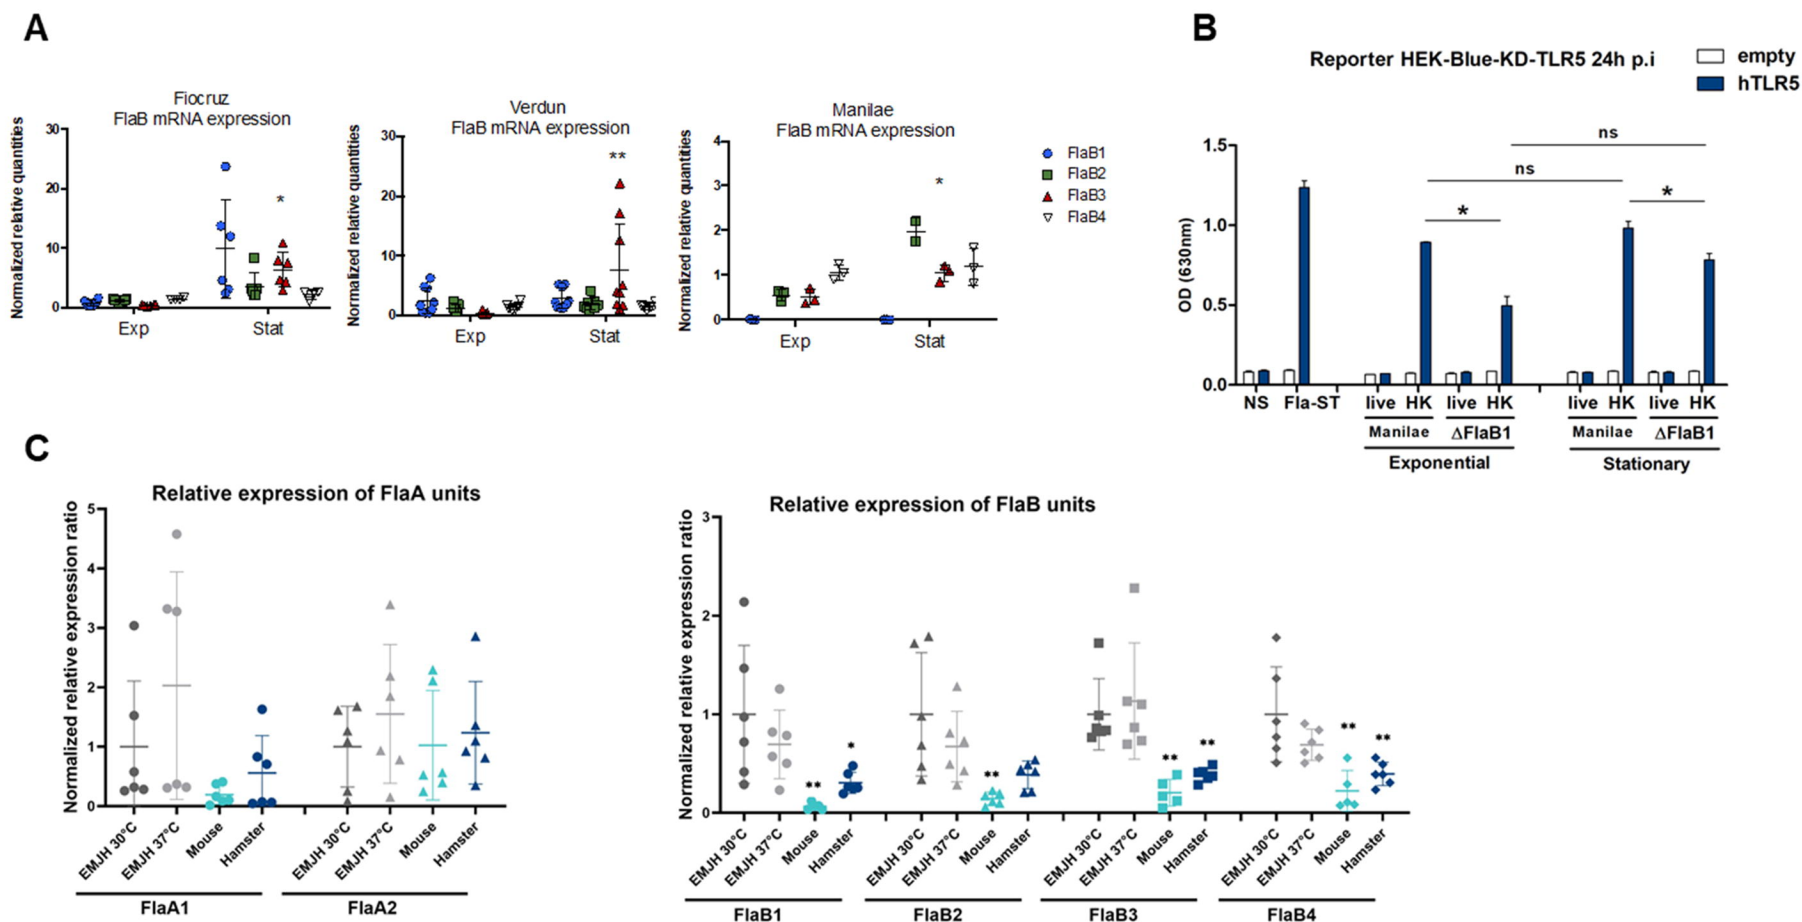

Source: https://biorxiv.org/content/10.1101/2020.05.30.121202v1.full.pdf
